# Supplementary material for: ABA homeostasis and long-distance translocation are redundantly regulated by ABCG ABA importers
Source: PubMed Central journal article supplement — Sci Adv. 2021 Oct 20;7(43):eabf6069. doi: 10.1126/sciadv.abf6069 (PMC8528425; doi:10.1126/sciadv.abf6069), 2021-10-20
Supplement: sciadv.abf6069_sm.pdf [file sciadv.abf6069_sm.pdf]

## Supplementary Materials for

### **ABA homeostasis and long-distance translocation are redundantly regulated by ABCG ABA importers**

Yuqin Zhang, Himabindu Vasuki Kilambi, Jie Liu, Hamutal Bar, Shani Lazary, Aiman Egbaria, Dagmar Ripper, Laurence Charrier, Zeinu Mussa Belew, Nikolai Wulff, Suresh Damodaran, Hussam Hassan Nour-Eldin, Asaph Aharoni, Laura Ragni, Lucia Strader, Nir Sade, Roy Weinstain, Markus Geisler, Eilon Shani\*

\*Corresponding author. Email: [eilonsh@post.tau.ac.il](mailto:eilonsh@post.tau.ac.il)

Published 20 October 2021, *Sci. Adv.* 7, eabf6069 (2021)  
DOI: [10.1126/sciadv.abf6069](https://doi.org/10.1126/sciadv.abf6069)

#### **The PDF file includes:**

Figs. S1 to S24  
Tables S1 to S21  
General synthetic procedures  
Synthesis of compound 2 (ABA-FL)  
HPLC-MS analysis conditions  
Preparative HPLC purification conditions  
Quantifying ABA by LC-MS/MS (oocytes transport assays)  
Dataset S1

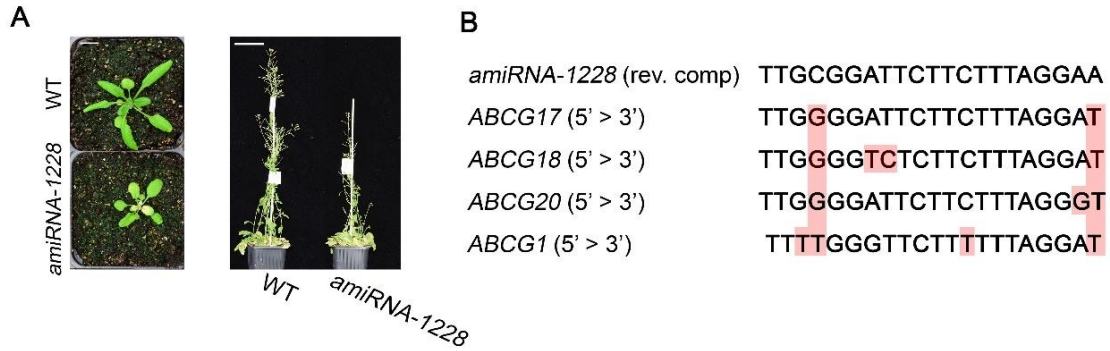

**Fig. S1. Characterization of *amiRNA-1228* line.** **A**, Shoot phenotypes of 20-day-old (left) and 50-day-old (right) WT and *amiRNA-1228* plants. Scale bar = 1 cm. **B**, *amiRNA-1228* sequence aligned to recognition sites of putative targets *ABCG17*, *ABCG18*, *ABCG20* and *ABCG1*. Red shading indicates mismatches with the *amiRNA-1228*. Photo Credit: Yuqin Zhang, Tel Aviv University.

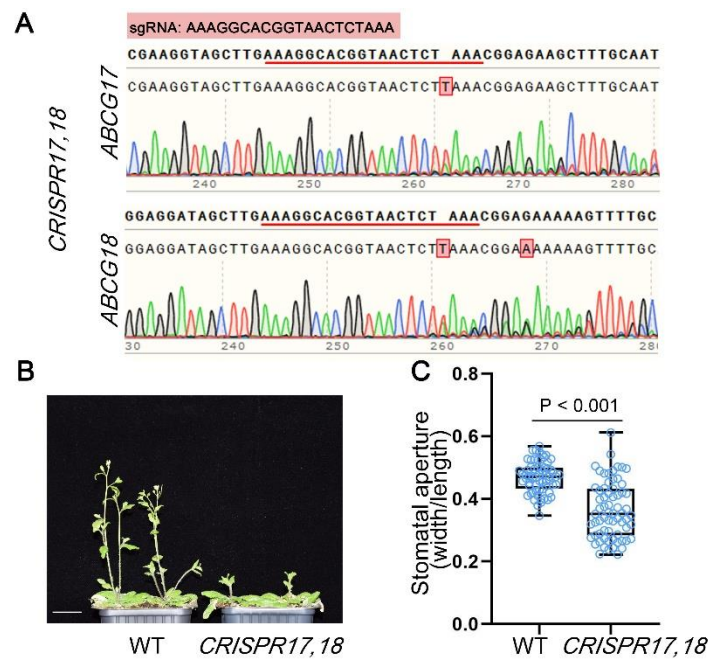

**Fig. S2. *ABCG17* and *ABCG18* CRISPR knockout plants show delayed growth and reduced stomatal aperture.** **A**, Sequencing chromatograms of *CRISPR17,18*. CRISPR mutations are in position 291 bp for *ABCG17* CDS and position 412 bp for *ABCG18* CDS. The CRISPR mutation is a single-base insertion (AAAGGCACGGTAACTCTtAAA, lower case "t" and T in red box in the chromatogram indicates for the insertion) for both genes. Sequences marked with a red line indicate for sgRNA. Mutations were somatic and did not pass to the next generation. **B**, Shoot phenotypes of 35-day-old plants grown in soil under normal conditions. Scale bar = 1 cm. Photo Credit: Yuqin Zhang, Tel Aviv University. **C**, Stomatal aperture measurements of 35-day-old plants of the indicated genotypes. Shown are averages ( $\pm$ SD),  $n \geq 64$ , P-value two-tailed Student's t-test is indicated.

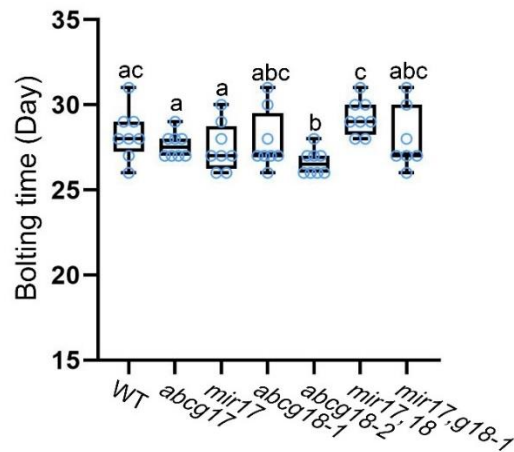

**Fig. S3. *ABCG17,18* loss-of-function lines do not present strong bolting time phenotypes.** Shown is the bolting time of the indicated *ABCG17,18* loss-of-function genotypes. Shown are averages ( $\pm$ SD),  $n \geq 7$ , different letters represent significant differences, one-way ANOVA with student's t-test ( $P < 0.05$ ).

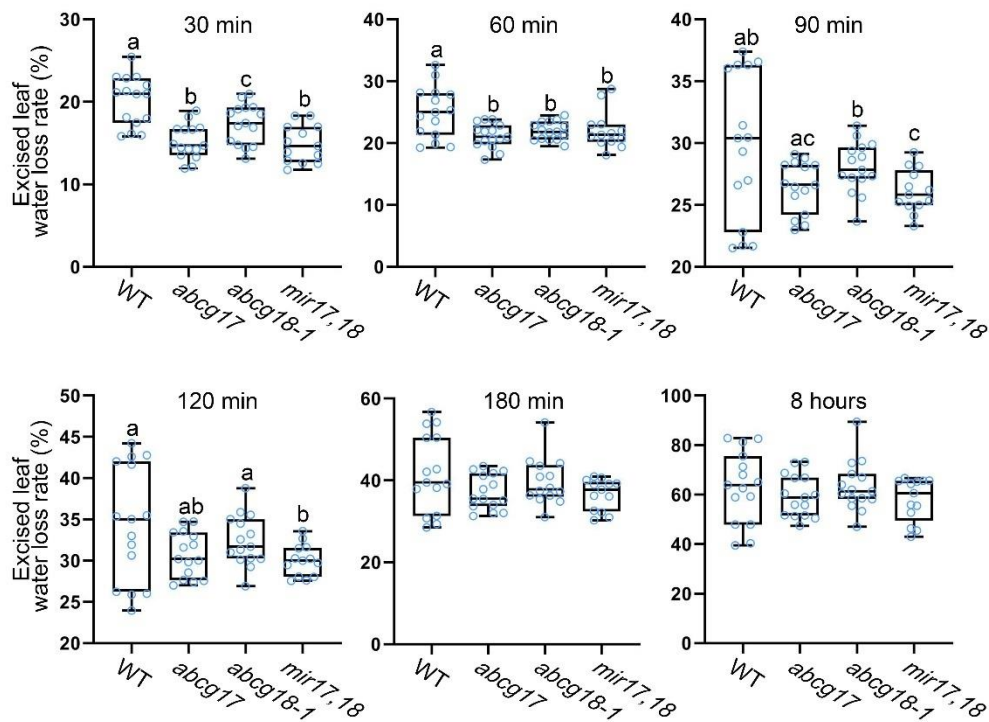

**Fig. S4. *ABCG17* and *ABCG18* knockdowns result in a reduced water-loss rate.** Percentage of water-loss rates of leaves excised from 30-day-old plants of the indicated genotypes at indicated time-points, exposed to room temperature air. Shown are averages ( $\pm$ SD),  $n \geq 13$ , different letters represent significant differences, one-way ANOVA with student's t-test ( $P < 0.05$ ). No significant differences were observed for 180 min and 8 hours time-points ( $P < 0.05$ ).

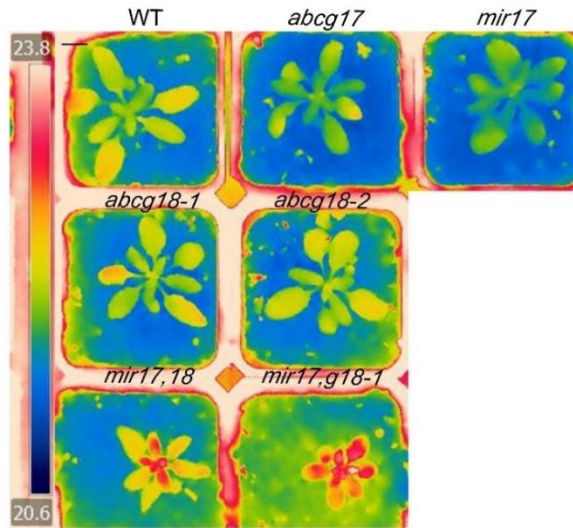

**Fig. S5. *ABCG17* and *ABCG18* redundantly regulate leaf temperature.** Thermal images of 25-day-old plants of the indicated genotypes grown on soil under normal conditions. The shown image was taken in a single take for all genotypes. *mir17,18* is *ABCG17*, *ABCG18* double-knockdown amiRNA line, *mir17,g18-1* is *mir17* (*amiRNA-ABCG17*) transformed into the background of *abcg18-1* T-DNA line. Color-coded scale bar indicates temperature. Black scale bar = 1 cm.

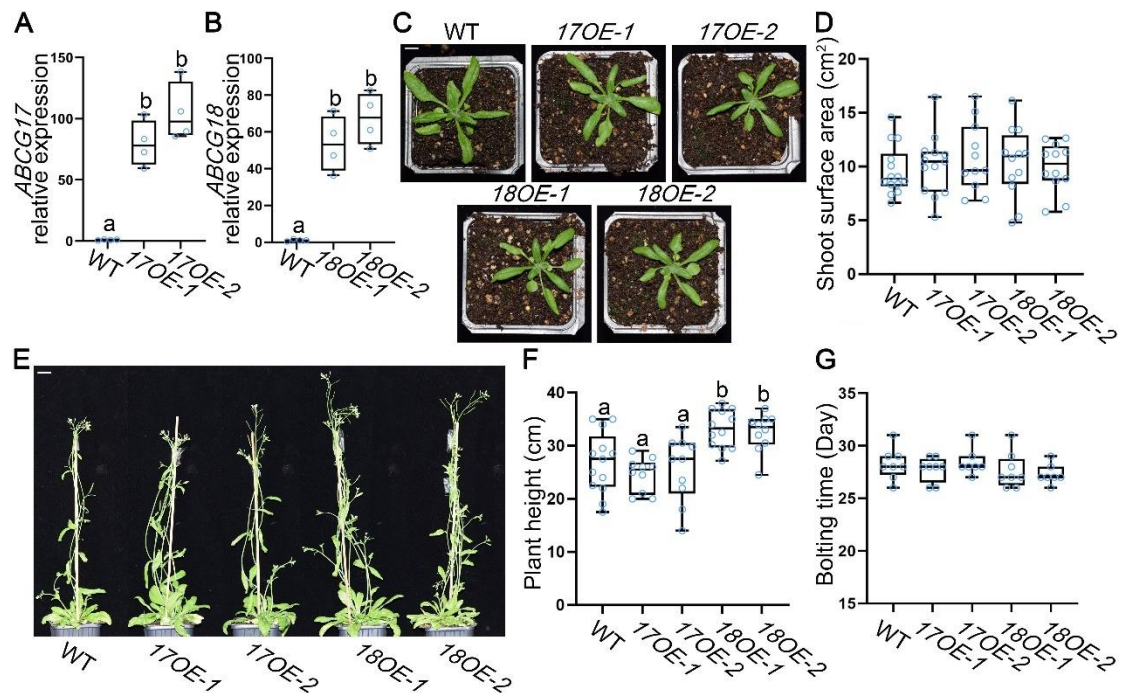

**Fig. S6. Characterization of *ABCG17* and *ABCG18* overexpression lines.** **A**, *ABCG17* mRNA relative expression in *ABCG17* overexpressing lines, quantified by qRT-PCR. Shown are averages ( $\pm$ SD),  $n = 4$ , different letters represent significant differences, one-way ANOVA with student's t-test ( $P < 0.05$ ). **B**, *ABCG18* mRNA relative expression in *ABCG18* overexpressing lines, quantified by qRT-PCR. Shown are averages ( $\pm$ SD),  $n = 4$ , different letters represent significant differences, one-way ANOVA with student's t-test ( $P < 0.05$ ). **C**, Shoot



phenotypes of 25-day-old plants of the indicated genotypes grown on soil under normal conditions. Scale bar = 1 cm. **D**, Quantification of shoot surface areas of the indicated lines. Shown are averages ( $\pm$ SD),  $n \geq 11$  plants. Results were not significant at  $P > 0.05$  by one-way ANOVA with student's t-test ( $P < 0.05$ ). **E**, Phenotypes of 45-day-old plants grown in soil under normal conditions. Scale bar = 2 cm. **F**, Heights of 45-day-old plants of the indicated genotypes. Shown are averages ( $\pm$ SD),  $n \geq 11$  plants, different letters represent significant differences, one-way ANOVA with student's t-test ( $P < 0.05$ ). **G**, Bolting time of the indicated genotypes. Shown are averages ( $\pm$ SD),  $n \geq 7$ . No significant differences were observed in one-way ANOVA with student's t-test ( $P < 0.05$ ). Photo Credit: Yuqin Zhang, Tel Aviv University.

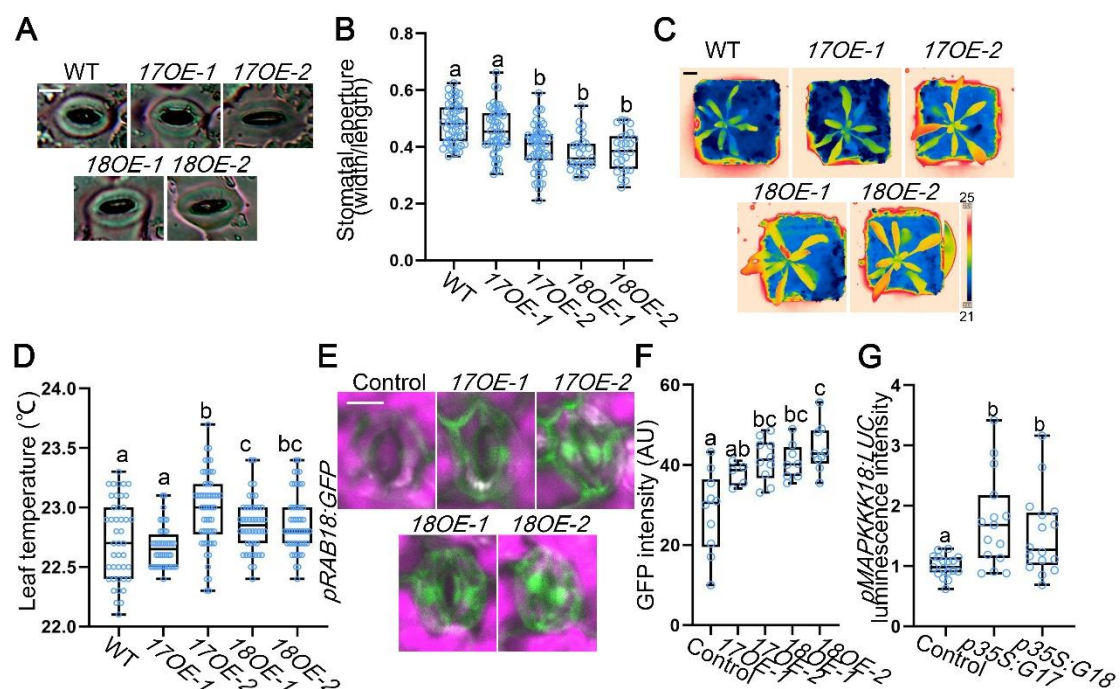

**Fig. S7. *ABCG17* or *ABCG18* overexpression promotes ABA responses in shoots.** **A**, Stomatal impressions of the indicated genotypes. Scale bar = 10  $\mu$ m. **B**, Width/length ratio of stomatal apertures of 25-day-old plants of the indicated genotypes. Shown are averages ( $\pm$ SD),  $n \geq 28$ , different letters represent significant differences, one-way ANOVA with student's t-test ( $P < 0.05$ ). **C**, Thermal images of 25-day-old plants of the indicated genotypes grown on soil under normal conditions. Color-coded scale bar indicates temperature. Black Scale bar = 1 cm. **D**, Quantification of leaf temperature measurements of 25-day-old plants of the indicated genotypes. Shown are averages ( $\pm$ SD),  $n \geq 43$ , different letters represent significant differences, one-way ANOVA with student's t-test ( $P < 0.05$ ). **E**, *pRAB18:GFP* intensity in guard cells of 12-day-old lines expressing *p35S:ABCG17* (*17OE-1* and *17OE-2*) or *p35S:ABCG18* (*18OE-1* and *18OE-2*). Green stands for GFP, purple stands for chlorophyll. Scale bar = 10  $\mu$ m. **F**, Quantification of respective GFP signal intensity in (E). Shown are averages ( $\pm$ SD),  $n \geq 5$ , different letters represent significant differences, one-way ANOVA with student's t-test ( $P < 0.05$ ). **G**, *pMAPKKK18:LUC* bioluminescence intensity in shoots of 12-day-old *ABCG17* (*p35S:G17*) and *ABCG18* (*p35S:G18*) overexpression lines. Shown are averages ( $\pm$ SD),  $n \geq 15$ , different letters represent significant differences, one-way ANOVA with student's t-test ( $P < 0.05$ ).

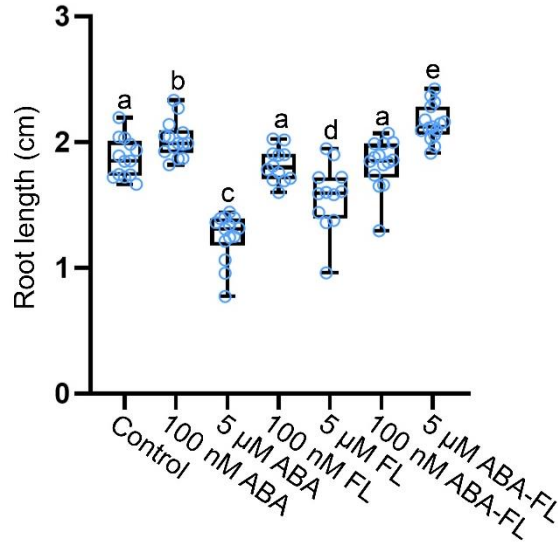

**Fig. S8. ABA-FL has slight but significant activity in root growth assays.** Characterization of synthetic ABA-FL activity in 7-day-old *Arabidopsis* root growth assays. Four-day-old seedlings were treated with the indicated concentration of ABA, FL, or ABA-FL for 3 days prior to measurements. Shown are averages ( $\pm$ SD),  $n \geq 15$ , different letters represent significant differences, one-way ANOVA with student's t-test ( $P < 0.05$ ). ABA-FL: ABA-Fluorescein.

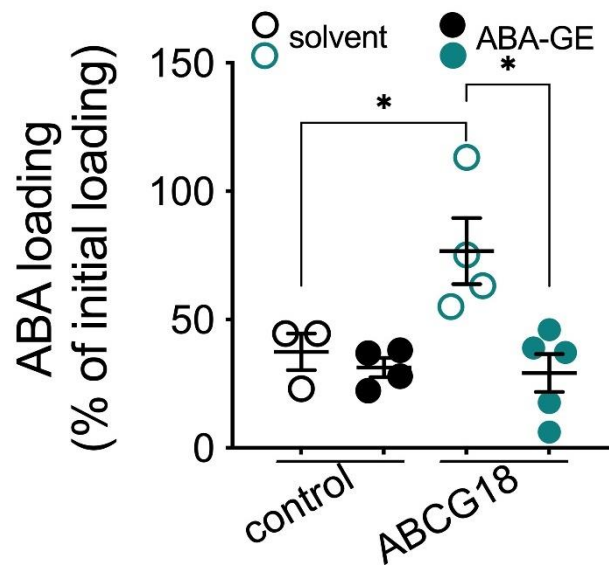

**Fig. S9. ABA-GE competes with ABA in ABCG18 uptake assays.** ABA-GE competition experiments with ABA uptake into protoplasts prepared from tobacco leaves transfected with *p35S:YFP-ABCG18* (*ABCG18*) or vector control. The solvent or ABA-GE in a 1000-fold excess in comparison to [ $^3$ H]ABA (adjusted to 10 nM) was added; shown are mean  $\pm$ SE ( $n \geq 3$ ), significant differences ( $P < 0.05$ ) to solvent control were determined by a one-sample t and Wilcoxon test and are indicated by an asterisk.

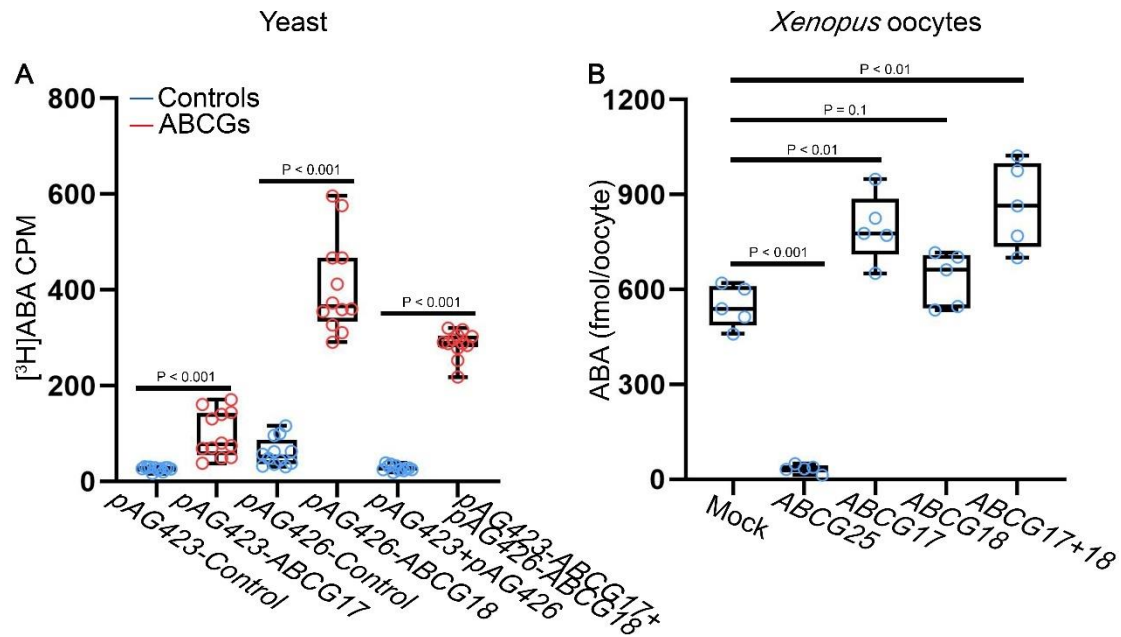

**Fig. S10. ABCG17 and ABCG18 import ABA into yeast and *Xenopus* oocyte cells.** **A**, ABA transport assay in yeast for the indicated ABCGs. Yeast strain YMM12 expressing *pAG423-ABCG17* (*ABCG17* in the *pAG423* vector), *pAG426-ABCG18* (*ABCG18* in the *pAG426* vector), and combination of both *ABCG17* and *ABCG18* with their corresponding controls were treated with 15 nM [ $^3\text{H}$ ]ABA for 3 h. The cells were washed three times and resuspended in 0.1 M MES buffer, pH = 4.6. The radioactivity was analyzed by scintillation counting. Shown are boxplot data from  $n = 12$ . P-value two-tailed Student's t-test is indicated for each analysis. **B**, ABA transport assay in *Xenopus* oocytes for the indicated ABCGs. Shown are the average values of ABA content per oocyte (fmol/oocyte). Media ABA concentration is 10  $\mu\text{M}$  (pH 5.8). Shown are averages ( $\pm\text{SD}$ ),  $n = 5 \times 4$  oocytes. P-value two-tailed Student's t-test is indicated for each analysis.

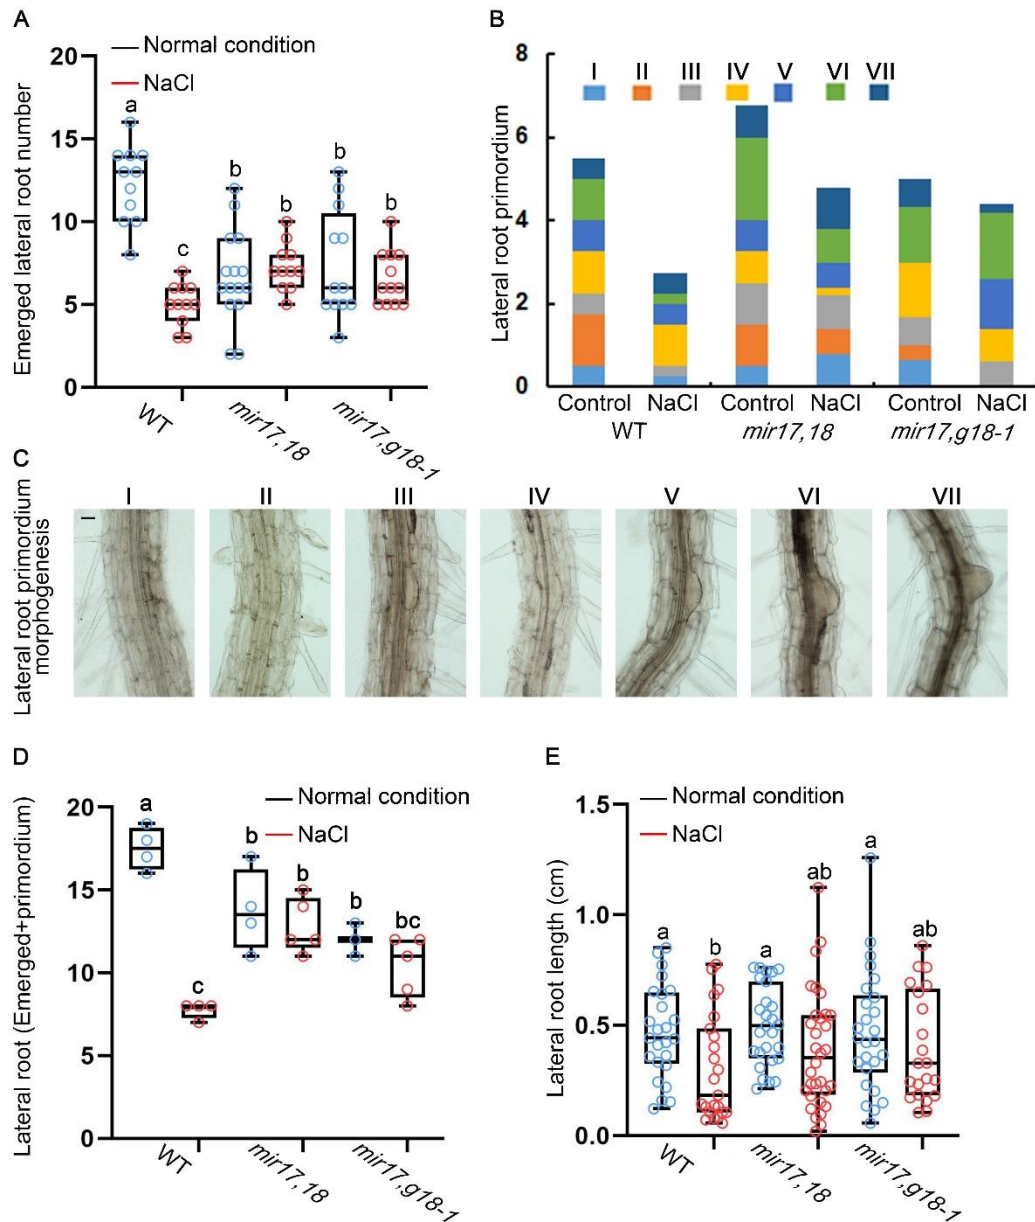

**Fig. S11. Characterization of lateral root initiation, emergence and length of *ABCG17* and *ABCG18* double knockdown lines with and without NaCl treatment.** **A**, Emerged lateral root number of 10-day-old seedlings of the indicated genotypes with and without 5-day 100 mM NaCl treatment. Shown are averages ( $\pm$ SD),  $n \geq 11$ , one-way ANOVA with student's t-test ( $P < 0.05$ ). **B**, Lateral root primordium number of the indicated genotypes at different stages with and without 5-day 100 mM NaCl treatment. Shown are averages ( $\pm$ SD),  $n \geq 4$ . Values and statistics for each developmental stage are presented in **Supplementary Tables 2-3**. **C**, Developmental stages during *Arabidopsis* lateral root primordium morphogenesis. Scale bar = 25  $\mu$ m. **D**, Lateral root initiation number including primordium and emerged lateral root of the indicated genotypes with and without 5-day 100 mM NaCl treatment. Shown are averages ( $\pm$ SD),  $n = 4$ , one-way ANOVA with student's t-test ( $P < 0.05$ ). **E**, Lateral root length of the first 3 roots (closest to the hypocotyl) of the indicated genotypes with and without 5-day 100 mM NaCl treatment. Shown are averages ( $\pm$ SD),  $n \geq 21$ , one-way ANOVA with student's t-test ( $P < 0.05$ ). Different letters represent significant differences.



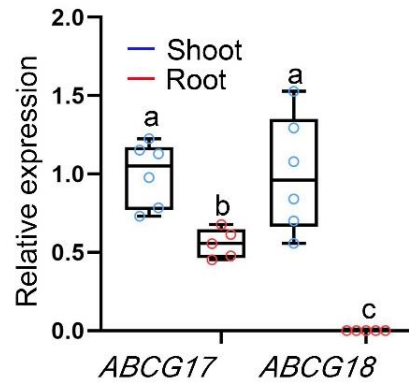

**Fig. S12. Relative expression of *ABCG17* and *ABCG18* in *Arabidopsis* shoots and roots.** Quantified by qRT-PCR. Shown are averages ( $\pm$ SD),  $n \geq 5$ , different letters represent significant differences, one-way ANOVA with student's t-test ( $P < 0.05$ ).

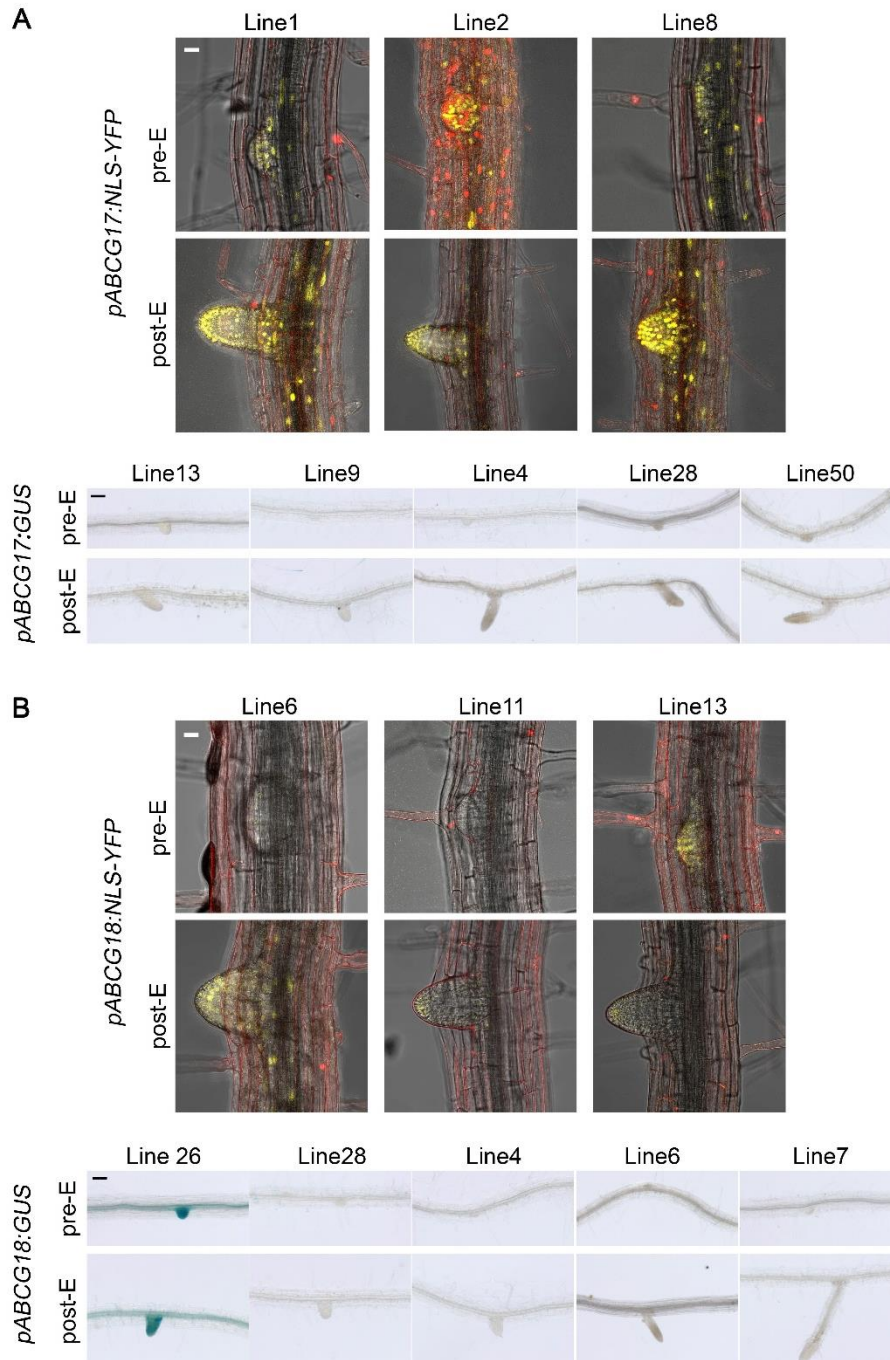

**Fig. S13. *ABCG17* and *ABCG18* are weakly expressed during lateral root development. A,** Images of lateral root pre-and post-emergence sites of *pABCG17:NLS-YFP* (YFP in yellow), and *pABCG17:GUS*. The presented images are additional independent lines to the ones presented in **Fig. 6D-E**. Scale bar for YFP images = 20  $\mu$ m. Scale bar for GUS images = 100  $\mu$ m. **B,** Images of lateral root pre-and post-emergence sites of *pABCG18:NLS-YFP* (YFP in yellow), and *pABCG18:GUS*. The presented images are additional independent lines to the ones presented in **Fig. 6D-E**. Scale bar for YFP images = 20  $\mu$ m. Scale bar for GUS images = 100  $\mu$ m. pre-E: pre-emergence, post-E: post-emergence.

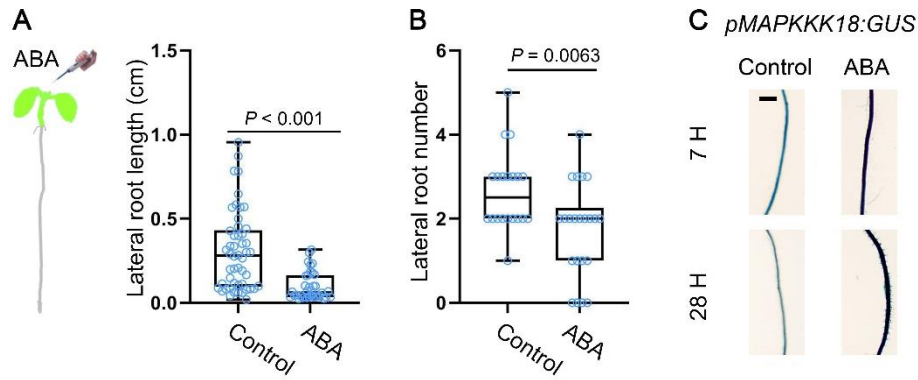

**Fig. S14. Exogenous ABA application to WT shoot affects lateral root growth and induces ABA response in the root.** **A**, Left, an illustration of shoot-specific ABA application. Right, lateral root length graph of 10-day-old WT seedlings without (Control) and with 5  $\mu$ M ABA treatment of shoots of 5-day-old seedlings for 5 days. Shown are averages ( $\pm$ SD),  $n \geq 20$ ,  $P < 0.001$  ( $P = 2.26685E-06$ ) indicates significant differences, student's t-test. **B**, Lateral root number of 10-day-old WT seedlings without (Control) and with 5  $\mu$ M ABA treatments to shoot of 5-day-old seedlings for 5 days. Shown are averages ( $\pm$ SD),  $n \geq 20$ , P value indicates significant differences, student's t-test. **C**, *pMAPKKK18:GUS* reporter signal imaged in 5-day-old roots in response to 5  $\mu$ M ABA shoot-specific application or no ABA treatment (Control) after 7 and 28 hours. Scale bar = 1 mm.

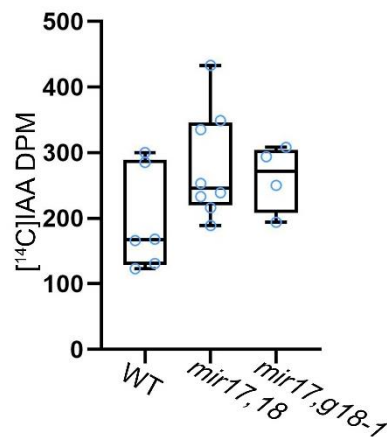

**Fig. S15. Shoot-to-root IAA translocation is not affected in *ABCG17,18* loss-of-function lines.** 0.1  $\mu$ Ci/ml [<sup>14</sup>C]IAA was applied only to shoots. Shown are [<sup>14</sup>C]IAA levels explicitly in roots, quantified as disintegration per minute (DPM) after background deduction. Shown are averages ( $\pm$ SD),  $n \geq 6$ . No significant differences were observed in one-way ANOVA with student's t-test ( $P < 0.05$ ).

|                 | Scale bar  |        |      |       |          |       |
|-----------------|----------------------------------------------------------------------------------------------|--------|------|-------|----------|-------|
|                 | 0                                                                                            |        |      |       |          | 70    |
| WT              | 1.02                                                                                         | 0.26   | 1.18 | 0.30  | 3.83     | 64.34 |
| <i>abcg17</i>   | 0.95                                                                                         | 0.08   | 0.06 | 1.39  | 67.87    | 33.59 |
| <i>abcg18</i>   | 0.96                                                                                         | 0.01   | 0.32 | 0.90  | 4.82     | 27.20 |
| <i>mir17,18</i> | 1.52                                                                                         | 0.06   | 1.10 | 0.36  | 8.26     | 69.22 |
|                 | ABA                                                                                          | ABA-GE | PA   | neoPA | 7-OH ABA | DPA   |

**Fig. S16. *ABCG17* and *ABCG18* knockdown lines show alteration in shoot ABA homeostasis.** Heat-map profile of absolute values (ng/g FW) for ABA and its metabolites in shoots of the indicated genotypes (12-day-old plants). Color-coded data is presented in absolute values and is similar to the normalized data shown in **Fig. 7C**.  $n \geq 6$ , different letters represent significant differences, one-way ANOVA with student's t-test ( $P < 0.05$ ). Abbreviations: ABA (Abscisic acid), ABA-GE (Abscisic acid-1-Beta-glucose ester), PA (Phaseic acid), neoPA (neo Phaseic acid), 7-OH ABA (7-hydroxy abscisic acid), DPA (Dihydrophaseic acid).

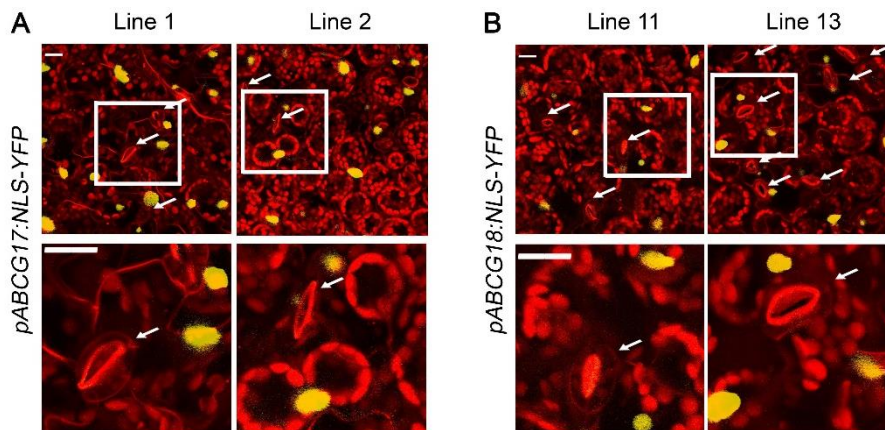

**Fig. S17. *ABCG17* and *ABCG18* are primarily expressed in mesophyll cells.** A-B, *pABCG17:NLS-YFP* (A) and *pABCG18:NLS-YFP* (B) signal (yellow) in leaves. The presented images are additional independent lines to the ones presented in **Fig. 7D**. The white arrows point to guard cells. Images at the bottom are magnifications of areas indicated by white boxes in the images above. Chlorophyll in red. All scale bars = 20  $\mu\text{m}$ .

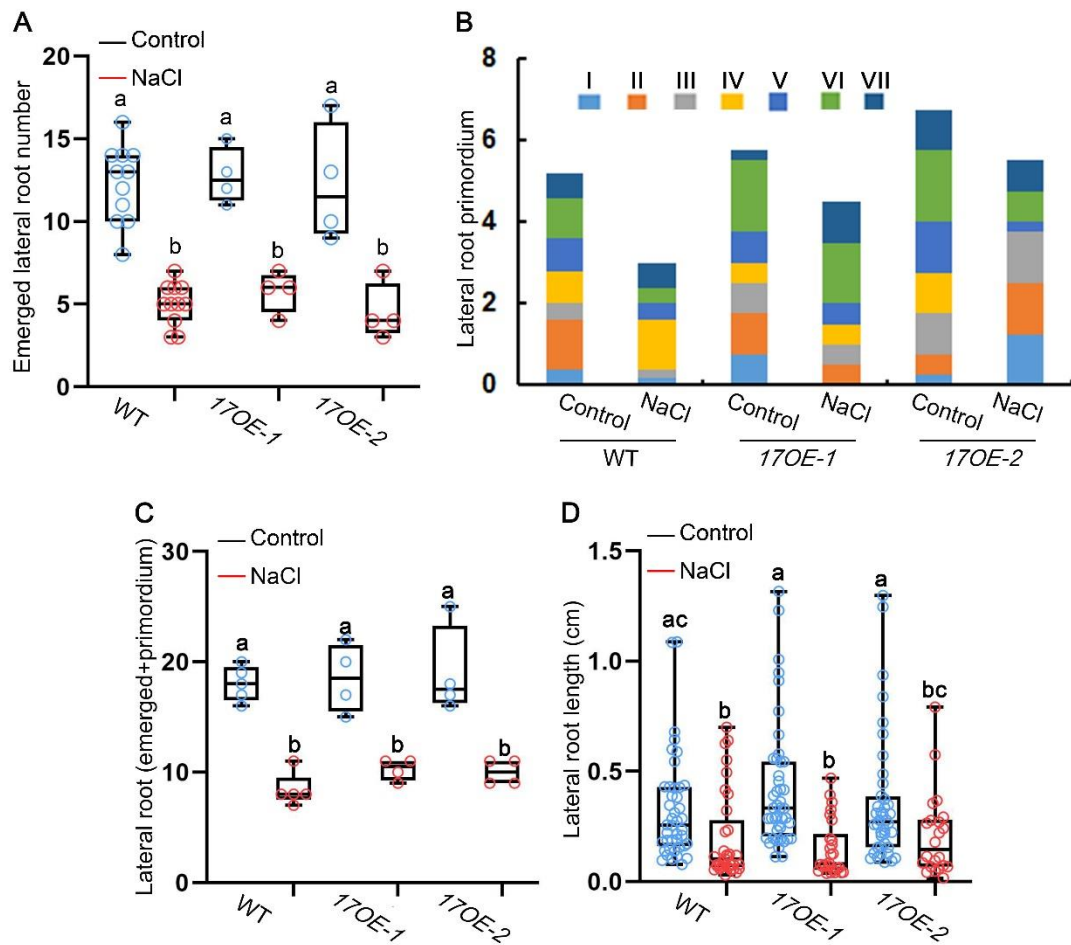

**Fig. S18. Characterization of lateral root initiation, emergence and length of *ABCG17* overexpression lines with and without NaCl treatment.** **A**, Emerged lateral root number of 10-day-old seedlings of the indicated genotypes with and without 5-day 100 mM NaCl treatment. Shown are averages ( $\pm$ SD),  $n \geq 4$ , different letters represent significant differences, one-way ANOVA with student's t-test ( $P < 0.05$ ). **B**, Lateral root primordium number of the indicated genotypes at different stages with and without 5-day 100 mM NaCl treatment. Shown are averages ( $\pm$ SD),  $n \geq 4$ . Values and statistics for each developmental stage are presented in **Supplementary Tables 5-6**. **C**, Lateral root initiation number including primordium and emerged lateral root of the indicated genotypes with and without 5-day 100 mM NaCl treatment. Shown are averages ( $\pm$ SD),  $n = 4$ , different letters represent significant differences, one-way ANOVA with student's t-test ( $P < 0.05$ ). **D**, Lateral root length of the first 3 roots (closest to the hypocotyl) of the indicated genotypes with and without 5-day 100 mM NaCl treatment. Shown are averages ( $\pm$ SD),  $n \geq 22$ , different letters represent significant differences, one-way ANOVA with student's t-test ( $P < 0.05$ ).



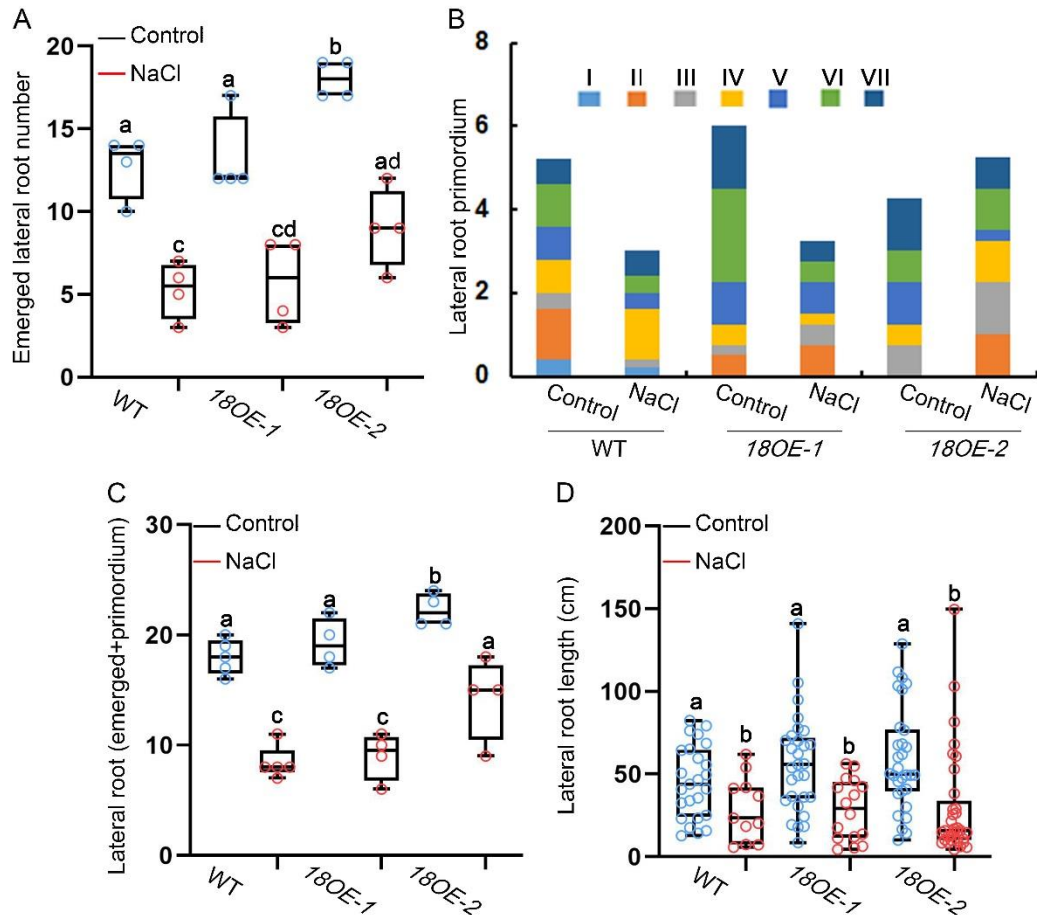

**Fig. S19. Characterization of lateral root initiation, emergence and length of *ABCG18* overexpression lines with and without NaCl treatment.** **A**, Emerged lateral root number of 10-day-old seedlings of the indicated genotypes with and without 5-day 100 mM NaCl treatment. Shown are averages ( $\pm$ SD),  $n = 4$ , different letters represent significant differences, one-way ANOVA with student's t-test ( $P < 0.05$ ). **B**, Lateral root primordium number of the indicated genotypes at different stages with and without 5-day 100 mM NaCl treatment. Shown are averages ( $\pm$ SD),  $n \geq 4$ . Values and statistics for each developmental stage are presented in **Supplementary Tables 7-8**. **C**, Lateral root initiation number including primordium and emerged lateral root of the indicated genotypes with and without 5-day 100 mM NaCl treatment. Shown are averages ( $\pm$ SD),  $n = 4$ , different letters represent significant differences, one-way ANOVA with student's t-test ( $P < 0.05$ ). **D**, Lateral root length of the first 3 roots (closest to the hypocotyl) of the indicated genotypes with and without 5-day 100 mM NaCl treatment. Shown are averages ( $\pm$ SD),  $n \geq 11$ , different letters represent significant differences, one-way ANOVA with student's t-test ( $P < 0.05$ ).

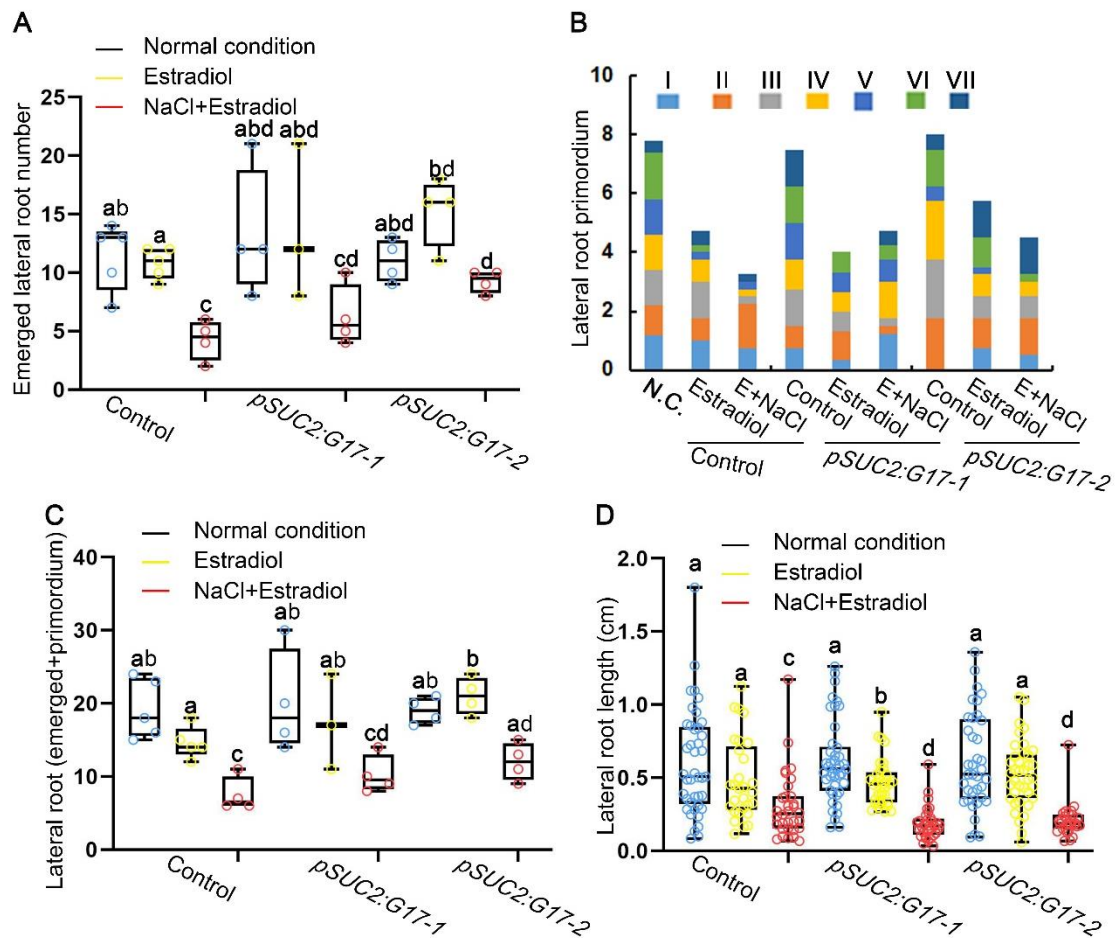

**Fig. S20. Characterization of lateral root initiation, emergence and length of estradiol inducible *pSUC2: XVE:G17* lines with and without NaCl treatment.** **A**, Emerged lateral root number of 10-day-old estradiol inducible seedlings of the indicated genotypes with and without 5-day 100 mM NaCl treatment. *pSUC2:XVE:ABCG17* induces *ABCG17* expression in an estradiol-dependent manner, specifically in the phloem companion cells. Shown are averages ( $\pm$ SD),  $n = 4$ , different letters represent significant differences, one-way ANOVA with student's *t*-test ( $P < 0.05$ ). **B**, Lateral root primordium number of the indicated estradiol inducible genotypes at different stages with and without 5-day 100 mM NaCl treatment. Shown are averages ( $\pm$ SD),  $n \geq 4$ . Values and statistics for each developmental stage are presented in **Supplementary Tables 9-11**. **C**, Lateral root initiation number including primordium and emerged lateral root of the indicated estradiol inducible genotypes with and without 5-day 100 mM NaCl treatment. Shown are averages ( $\pm$ SD),  $n = 4$ , different letters represent significant differences, one-way ANOVA with student's *t*-test ( $P < 0.05$ ). **D**, Lateral root length of the first 3 roots (closest to the hypocotyl) of the indicated estradiol inducible genotypes with and without 5-day 100 mM NaCl treatment. Shown are averages ( $\pm$ SD),  $n \geq 26$ , different letters represent significant differences, one-way ANOVA with student's *t*-test ( $P < 0.05$ ). Estradiol concentration = 5  $\mu$ M.

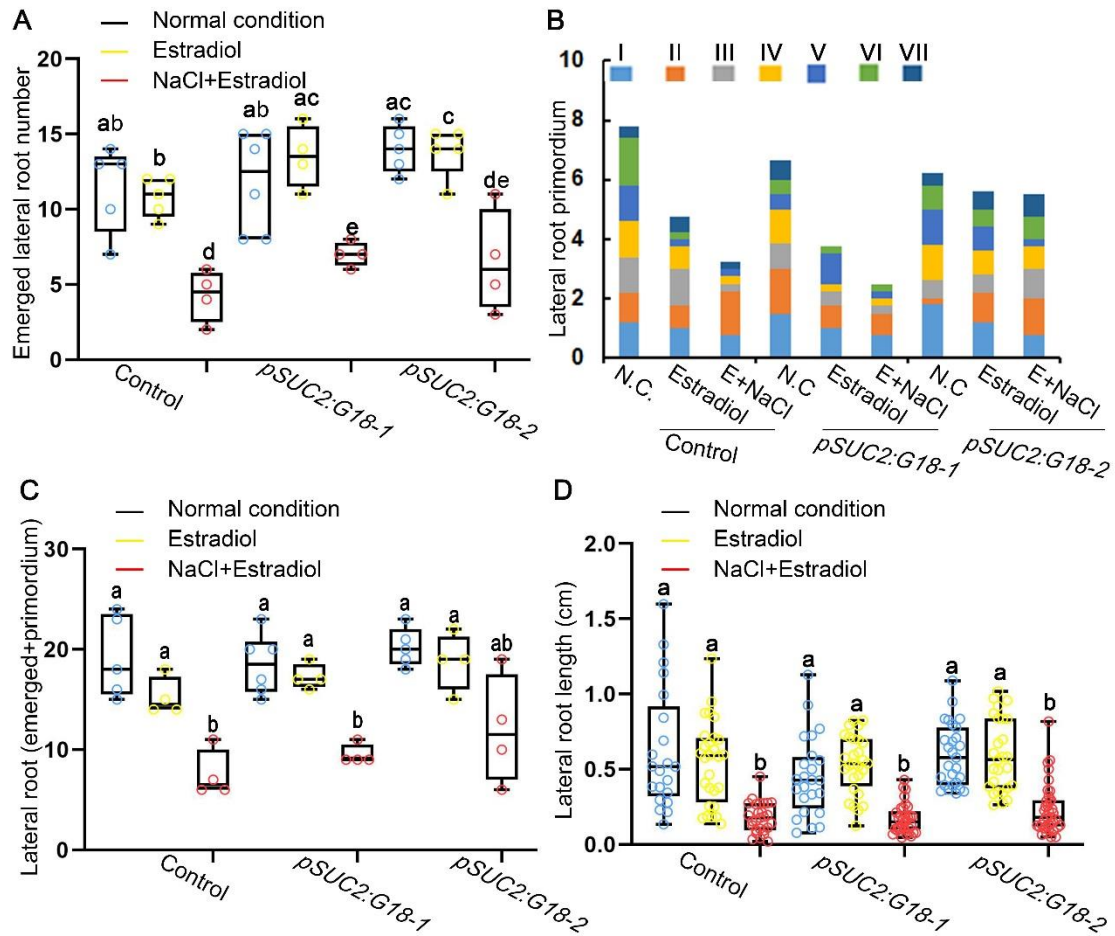

**Fig. S21. Characterization of lateral root initiation, emergence and length of estradiol inducible *pSUC2: XVE:G18* lines with and without NaCl treatment.** **A**, Emerged lateral root number of 10-day-old estradiol inducible seedlings of the indicated genotypes with and without 5-day 100 mM NaCl treatment. *pSUC2:XVE:ABCG18* induces *ABCG18* expression in an estradiol-dependent manner, specifically in the phloem companion cells. Shown are averages ( $\pm$ SD),  $n = 4$ , different letters represent significant differences, one-way ANOVA with student's t-test ( $P < 0.05$ ). **B**, Lateral root primordium number of the indicated estradiol inducible genotypes at different stages with and without 5-day 100 mM NaCl treatment. Shown are averages ( $\pm$ SD),  $n \geq 4$ . Values and statistics for each developmental stage are presented in **Supplementary Tables 12-14**. **C**, Lateral root initiation number including primordium and emerged lateral root of the indicated estradiol inducible genotypes with and without 5-day 100 mM NaCl treatment. Shown are averages ( $\pm$ SD),  $n = 4$ , different letters represent significant differences, one-way ANOVA with student's t-test ( $P < 0.05$ ). **D**, Lateral root length of the first 3 roots (closest to the hypocotyl) of the indicated estradiol inducible genotypes with and without 5-day 100 mM NaCl treatment. Shown are averages ( $\pm$ SD),  $n \geq 21$ , different letters represent significant differences, one-way ANOVA with student's t-test ( $P < 0.05$ ). Estradiol concentration = 5  $\mu$ M.

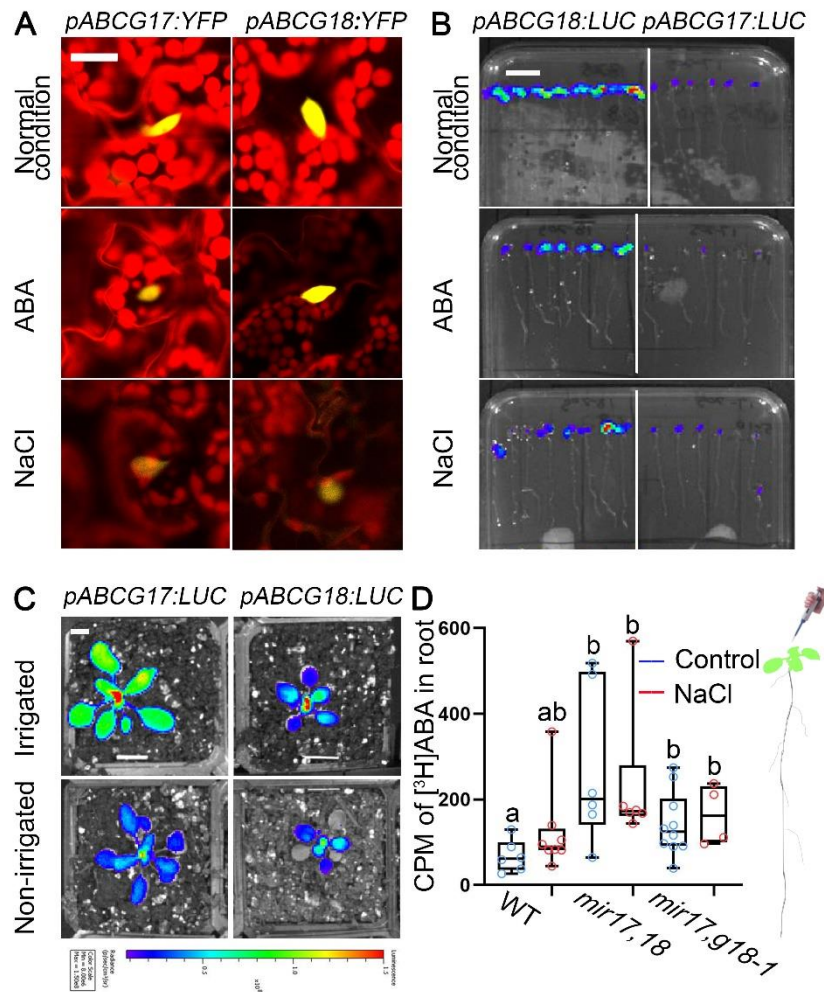

**Fig. S22. Abiotic stresses repress *ABCG17* and *ABCG18* expression in the shoot.** **A**, *pABCG17:YFP* (*pABCG17:NLS-YFP*) and *pABCG18:YFP* (*pABCG18:NLS-YFP*) signal (yellow) in mesophyll cells with 5  $\mu$ M ABA or 100 mM NaCl treatments for 3 days. Chlorophyll is in red. Scale bar = 20  $\mu$ m. **B**, Luciferase bioluminescence signal of *pABCG17:LUC* and *pABCG18:LUC* transgenic in 5-day-old plants treated with 5  $\mu$ M ABA or 100 mM NaCl for 3 days. Scale bar = 1 cm. **C**, Luciferase bioluminescence signal of *pABCG17:LUC* or *pABCG18:LUC* transgenic plants with and without irrigation. Plants were irrigated for 15 days following by water withhold for 1 week. Control plants (irrigated) were watered throughout the experiment. Color-coded scale bar indicates luciferase bioluminescence intensity. White scale bar = 1 cm. **D**, [<sup>3</sup>H]ABA counts per minute (CPM) in roots, after background deduction, following 24-hour [<sup>3</sup>H]ABA application to shoot with and without 100 mM NaCl treatment in the media (roots were isolated as indicated by a black line in the illustration on the right). Control samples were not treated with NaCl. Shown are averages ( $\pm$ SD),  $n \geq 4$ , different letters represent significant differences, one-way ANOVA with student's t-test ( $P < 0.05$ ).

## General synthetic procedures

(+)-ABA was purchased from Duchefa Biochemie. All other chemicals were purchased from Merck or Combi-Blocks and were used as received unless otherwise stated. Anhydrous solvents and reagents (DMF) were obtained as SureSeal bottles from Merck. Thin-layer chromatography and flash chromatography were performed using Merck KGaA pre-coated silica gel 60 F-254 plates and Silicycle silica gel 40-63 (230-400 mesh), respectively. UV absorbance spectra were recorded on Agilent Cary 60 UV-Vis Spectrophotometer. Fluorescence spectra were recorded on a Fluorolog 2 (Spex) fluorimeter. Low-resolution ESI mass spectrometry was performed on LC/MS Acquity QDa detector coupled with a Waters HPLC. High-resolution ESI mass spectrometry was performed on a Waters SYNAPT system.  $^1\text{H}$  and  $^{13}\text{C}$  NMR spectra were collected in DMSO- $d_6$  (Cambridge Isotope Laboratories) at 25 °C using a Bruker Advance III spectrometer at 400 MHz and 100 MHz, respectively, at the Department of Chemistry NMR Facility at Tel-Aviv University. All chemical shifts are reported in the standard  $\delta$  notation of parts per million using either TMS or residual solvent peak as an internal reference. Abbreviations: DMF, dimethylformamide; HATU, hexafluorophosphate azabenzotriazole tetramethyl uronium; TFA, trifluoroacetic acid; DIPEA, *N,N*-diisopropylethylamine.

## Synthesis of compound 2 (ABA-FL)

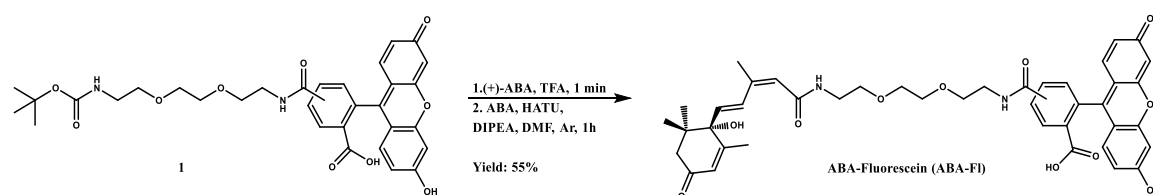

ABA conjugated to fluorescein was synthesized using a previously described protocol (57). Briefly, compound **1** (10.5 mg, 1 eq) was dissolved in 0.5 mL TFA and stirred for 1 minute. TFA was immediately removed under reduced pressure. The residue was dissolved in dry DMF under argon atmosphere, and DIPEA (3.3  $\mu\text{L}$ , 1.1 eq) was added. In a separate 1.5-mL Eppendorf tube, (+)-ABA (5 mg, 1.1 eq) was dissolved in dry DMF, then DIPEA (7.5  $\mu\text{L}$ , 1.1 eq) and HATU (7.2 mg, 1.1 eq) were added. The mixture was vortexed for 1 minute and then was added to the TFA-treated compound **1**. The reaction was stirred at room temperature for 1 hour, and the solvent was removed under reduced pressure. The residue was dissolved in 2 mL acetonitrile:water (2:1, v/v) and the desired product was purified using preparative HPLC (see “Preparative HPLC purification conditions” section). Preparative HPLC retention time: 13.52 minutes. The desired ABA-FL was obtained as a yellow solid (7.0 mg, yield 55%).  $^1\text{H}$  NMR (400 MHz, DMSO- $d_6$ )  $\delta$  = 10.20 (s, 1H), 8.91 (t,  $J$  = 5.5 Hz, 1H), 8.77 (t,  $J$  = 5.6 Hz, 1H), 8.46 (d,  $J$  = 1.5 Hz, 1H), 8.25 (dd,  $J_1$  = 8.1,  $J_2$  = 1.6 Hz, 1H), 8.17 (dd,  $J_1$  = 8.0,  $J_2$  = 1.4 Hz, 1H), 8.06 (d,  $J$  = 8.0 Hz, 1H), 7.95 (dt,  $J_1$  = 14.2,  $J_2$  = 5.6 Hz, 2H), 7.88 (d,  $J$  = 4.6 Hz, 1H), 7.84 (d,  $J$  = 4.6 Hz, 1H), 7.69 (s, 1H), 7.37 (d,  $J$  = 8.1 Hz, 1H), 6.70 (t,  $J$  = 2.6 Hz, 3H), 6.56 (dt,  $J_1$  = 8.4,  $J_2$  = 3.0 Hz, 7H), 6.08 (s, 1H), 6.03 (s, 1H), 5.80 (d,  $J$  = 5.1 Hz, 2H), 5.72 (d,  $J$  = 7.9 Hz, 2H), 5.13 (d,  $J$  = 2.2 Hz, 2H), 3.55 (dd,  $J_1$  = 7.1,  $J_2$  = 4.9 Hz, 6H), 3.48 – 3.40 (m, 10H), 3.20 (dd,  $J_1$  = 19.0,  $J_2$  = 5.8 Hz, 6H), 2.09 (s, 1H), 2.04 (s, 1H), 1.97 (d,  $J$  = 1.3 Hz, 1H), 1.89 (t,  $J$  = 1.5 Hz, 5H), 1.82 (d,  $J$  = 1.4 Hz, 6H), 1.24 (d,  $J$  = 4.3 Hz, 7H), 0.93 (dd,  $J_1$  = 13.5,  $J_2$  = 3.1 Hz, 13H).;  $^{13}\text{C}$  NMR (101 MHz, DMSO- $d_6$ )  $\delta$  = 197.34, 168.12, 165.56, 165.55, 164.82,



164.67, 163.61, 159.72, 151.90, 143.91, 140.63, 136.25, 135.37, 129.27, 129.19, 128.04, 125.99, 125.88, 122.37, 121.41, 112.83, 112.77, 109.20, 109.14, 102.35, 78.45, 69.64, 69.55, 69.18, 68.86, 68.71, 49.45, 41.38, 24.21, 23.24, 20.86, 19.06.; LC/MS: Retention time 9.77 min, 753.47 [M+H]<sup>+</sup>, HR-MS(EI) calcd. for formula C<sub>42</sub>H<sub>44</sub>N<sub>2</sub>O<sub>11</sub>Na [M+Na]<sup>+</sup>: 775.2843; Found: 775.2841.

### HPLC-MS analysis conditions

HPLC-MS analysis was performed on a Waters HPLC equipped with an XBridge C18 column (100 X 3 mm, 5 μm) starting with 2 min of solvent A (0.1% TFA in water), followed by a gradient from 0% to 100% solvent B (0.1% TFA in acetonitrile) over 15 min, then 1 minute at 100% solvent B, and ending with 2 min 100% solvent A at flow rate of 1 mL/min. Mass spectrometry was performed on LC/MS Acquity QDa detector coupled with Waters HPLC.

### Preparative HPLC purification conditions

Preparative HPLC was performed on a Waters 2545 HPLC equipped with an XBridge C18 column (100 X 19 mm, 5 μm) starting with 2 min of solvent A (0.1% TFA in water), followed by a gradient from 0% to 80% solvent B (0.1% TFA in acetonitrile) in 20 min, continuing with 3 min gradient of 80% to 100% solvent B, then 3 min at 100% solvent B, and ending with 2 min 100% solvent A at a flow rate of 15 mL/min.

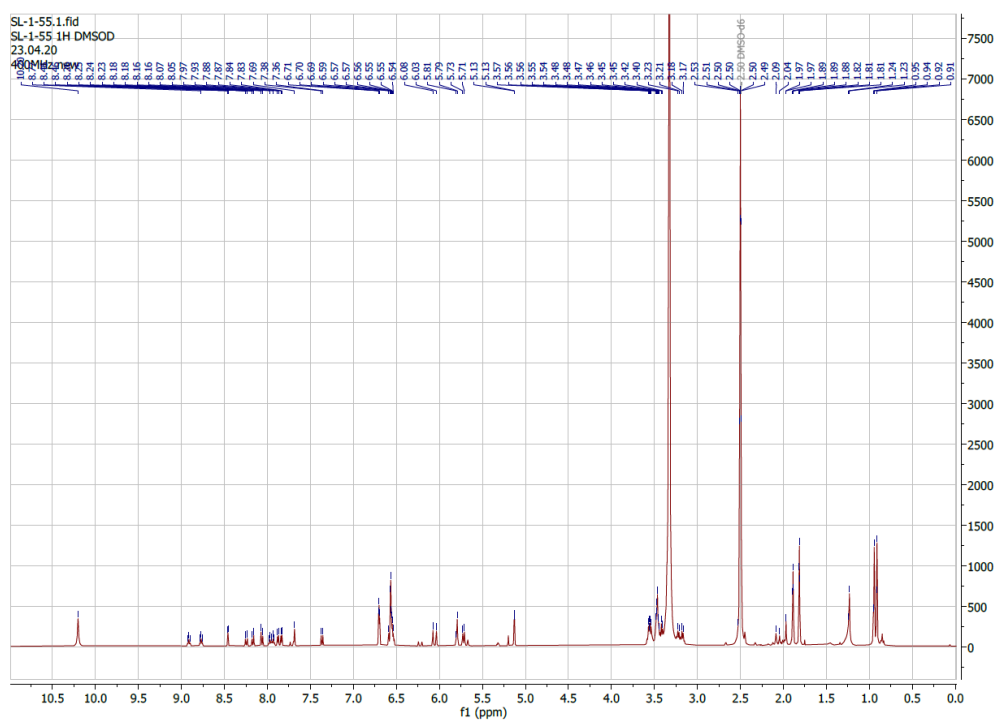

Fig. S23. <sup>1</sup>H-NMR spectrum of ABA-FL.

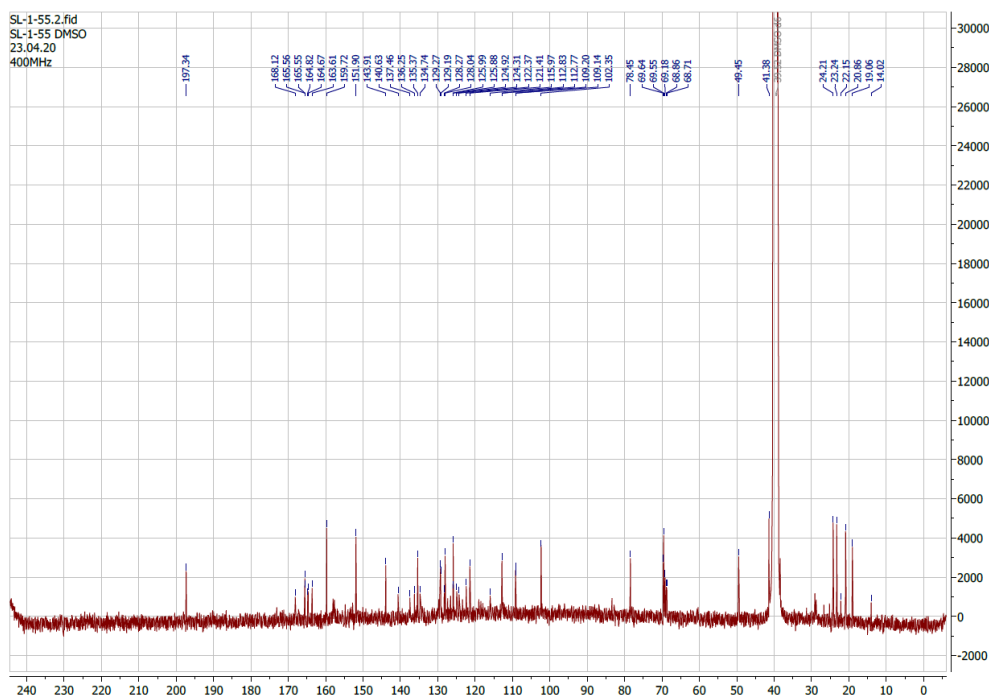

**Fig. S24.**  $^{13}\text{C}$ -NMR spectrum of ABA-FL.

### Quantifying ABA by LC-MS/MS (oocytes transport assays).

Oocyte samples were subjected to analysis by LC-MS/MS. Chromatography was performed on an Advance UHPLC system (Bruker, Bremen, Germany). Separation was achieved on a Kinetex 1.7  $\mu\text{m}$  XB-C18 column (100 x 2.1 mm, 1.7  $\mu\text{m}$ , 100  $\text{\AA}$ , Phenomenex, Torrance, CA, USA). Formic acid (0.05 %) in water and acetonitrile (supplied with 0.05 % formic acid) were employed as mobile phases A and B respectively. The elution profile was: 0-0.1 min, 5% B; 0.1-1.0 min, 5-45% B; 1.0-3.0 min 45-100% B, 3.0-3.5 min 100% B, 3.5-3.55 min, 100-5% B and 3.55-4.7 min 5% B. The mobile phase flow rate was 400  $\mu\text{l min}^{-1}$ . The column temperature was maintained at 40  $^{\circ}\text{C}$ . The liquid chromatography was coupled to an EVOQ Elite TripleQuad mass spectrometer (Bruker, Bremen, Germany) equipped with an electrospray ion source (ESI). The ion spray voltage was maintained at +5000 V and -3000 V, in positive and negative ion mode, respectively. MRM was used to monitor analyte molecular ion  $\rightarrow$  fragment ion transitions. MRM transitions were optimized by direct infusion experiments into the MS source or taken from literature. Detailed values for mass transitions and references are listed in **Supplementary Table 1**.

**Table 1. MRM transitions for LC-MS/MS analysis of ABA oocyte samples.**

| Analyte   | Retention Time<br>[min] | Q1<br>[m/z] | Q3<br>[m/z]         | CE<br>[eV] |
|-----------|-------------------------|-------------|---------------------|------------|
| ABA [M-H] | 2.00                    | 263.0       | 153.1 <sup>Qt</sup> | 7          |
|           |                         | 263.0       | 151.0               | 7          |

Qt = quantifier ion, additional transitions were used for identification only. CE = collision energy; Q = quadrupole.

**Table 2. Lateral root primordia number at different developmental stages of the double *ABCG17* and *ABCG18* knockdown lines under normal conditions. n ≥ 4 plants.**

| MS                 | I         | II        | III       | IV        | V        | VI        | VII       |
|--------------------|-----------|-----------|-----------|-----------|----------|-----------|-----------|
| WT                 | 0.5±0.58  | 1.25±1.26 | 0.5±0.57  | 1±0.82    | 1.75±0.5 | 1±0.82    | 0.5±0.58  |
| <i>mir17,18</i>    | 0.5±0.58  | 0.82±0.75 | 1±0.82    | 0.75±0.96 | 0.75±0.5 | 2±0.82    | 0.75±0.96 |
| <i>mir17,g18-1</i> | 0.67±0.58 | 0.33±0.58 | 0.67±0.58 | 1.33±1.53 | 0±0      | 1.33±0.58 | 0.67±0.58 |

**Table 3. Lateral root primordia number at different developmental stages of the double *ABCG17* and *ABCG18* knockdown lines with 100 mM NaCl treatment. n ≥ 4 plants.**

| NaCl               | I        | II  | III      | IV       | V        | VI       | VII      |
|--------------------|----------|-----|----------|----------|----------|----------|----------|
| WT                 | 0.25±0.5 | 0±0 | 0.25±0.5 | 1±0.82   | 0.5±0.58 | 0.25±0.5 | 0.5±0.58 |
| <i>mir17,18</i>    | 0±0      | 0±0 | 0±0      | 0.5±0.58 | 0.5±0.58 | 0.25±0.5 | 0±0      |
| <i>mir17,g18-1</i> | 0±0      | 0±0 | 0.6±0.55 | 0.8±1.3  | 1.2±0.84 | 1.6±1.52 | 0.2±0.45 |

**Table 4. Accuracy and precision parameters for ABA and ABA metabolites. Determined by UPLC-ESI-MS method. S-Shoot, R-Root.**

| S. No. | Compound      | LOD (µg/g) | LOQ (µg/g) | Spiked standard (ng/ml; low/medium/high) | Internal standard (ng/ml) | Method precision (RSD%, n = 5) |                    |                    | Method accuracy (% , n = 5) |                      |                      |
|--------|---------------|------------|------------|------------------------------------------|---------------------------|--------------------------------|--------------------|--------------------|-----------------------------|----------------------|----------------------|
|        |               |            |            |                                          |                           | Low                            | Medium             | High               | Low                         | Medium               | High                 |
| 1      | ABA           | 0.002      | 0.01       | 0.5 /10/ 900                             | 1250                      | 0.05(S)<br>0.8 (R)             | 1.2 (S)<br>1.7 (R) | 1.4 (S)<br>1.3 (R) | 90.2 (S)<br>88.2 (R)        | 91.8 (S)<br>94.6 (R) | 97.7 (S)<br>97.8 (R) |
| 2      | Neo PA        | 0.08       | 0.4        | 0.5 /10/ 900                             | 150                       | 3.0 (S)<br>5.5 (R)             | 4.1 (S)<br>7.4 (R) | 2.7 (S)<br>4.0 (R) | 92.6 (S)<br>94.0 (R)        | 88.9 (S)<br>92.0 (R) | 96.0 (S)<br>96.8 (R) |
| 3      | PA            | 0.6        | 2.5        | 0.5 /10/ 900                             | 60                        | 1.5 (S)<br>2.6 (R)             | 0.8 (S)<br>5.4 (R) | 2.3 (S)<br>2.7 (R) | 88.8 (S)<br>85.7 (R)        | 88.3 (S)<br>91.0 (R) | 91.2 (S)<br>98.2 (R) |
| 4      | 7-hydroxy ABA | 0.2        | 1.0        | 0.5 /10/ 900                             | 150                       | 6.1 (S)<br>7.7 (R)             | 4.1 (S)<br>7.1 (R) | 3.3 (S)<br>4.2 (R) | 96.4 (S)<br>89.0 (R)        | 98.8 (S)<br>97.7 (R) | 97.3 (S)<br>95.3 (R) |
| 5      | DPA           | 0.24       | 1.2        | 0.5 /10/ 900                             | 150                       | 3.3 (S)<br>4.9 (R)             | 5.9 (S)<br>4.7 (R) | 2.2 (S)<br>1.7 (R) | 97.1 (S)<br>95.1 (R)        | 90.1 (S)<br>99.1 (R) | 92.1 (S)<br>99.4 (R) |
| 6      | ABA GE        | 0.02       | 0.1        | 0.5 /10/ 900                             | 52.5                      | 0.7 (S)<br>1.5 (R)             | 0.5 (S)<br>0.4 (R) | 0.7 (S)<br>2.4 (R) | 95.0 (S)<br>99.3 (R)        | 89.3 (S)<br>92.3 (R) | 93.3 (S)<br>97.0 (R) |

Abbreviations: ABA (Abscisic acid), ABA-GE (Abscisic acid-1-Beta-glucose ester), PA (Phaseic acid), neoPA (neo Phaseic acid), 7-OH ABA (7-hydroxy abscisic acid), DPA (Dihydrophaseic acid). LOD is limit of detection, LOQ is limit of quantification, RSD is relative standard deviation.

**Table 5. Lateral root primordia number at different developmental stages of *ABCG17* overexpression lines under normal conditions. n ≥ 4 plants.**

| MS            | I        | II       | III       | IV       | V         | VI        | VII      |
|---------------|----------|----------|-----------|----------|-----------|-----------|----------|
| WT            | 0.4±0.55 | 1.2±1.1  | 0.4±0.54  | 0.8±0.84 | 0.8±0.45  | 1±0.71    | 0.6±0.55 |
| <i>17OE-1</i> | 0.75±0.5 | 1±0.82   | 0.75±0.96 | 0.5±0.58 | 0.75±0.96 | 1.75±0.96 | 0.25±0.5 |
| <i>17OE-2</i> | 0.25±0.5 | 0.5±0.58 | 1±0.82    | 1±0.82   | 1.25±0.5  | 1.75±0.5  | 1±1.15   |

**Table 6. Lateral root primordia number at different developmental stages of *ABCG17* overexpression lines with 100 mM NaCl treatment. n ≥ 4 plants, different letters represent significant differences, one-way ANOVA with student's t-test (P < 0.05)**

| NaCl          | I          | II          | III       | IV          | V        | VI        | VII      |
|---------------|------------|-------------|-----------|-------------|----------|-----------|----------|
| WT            | 0.2±0.45 a | 0±0 a       | 0.2±0.45  | 1.2±0.84 a  | 0.4±0.55 | 0.4±0.55  | 0.6±0.55 |
| <i>17OE-1</i> | 0±0 a      | 0.5±1 ab    | 0.5±1     | 0.5±0.58 ab | 0.5±0.58 | 1.5±1     | 1±0.82   |
| <i>17OE-2</i> | 1.25±0.5 b | 1.25±0.96 b | 1.25±0.96 | 0±0 b       | 0.25±0.5 | 0.75±0.96 | 0.75±0.5 |

**Table 7. Lateral root primordia number at different developmental stages of *ABCG18* overexpression lines under normal conditions.**  $n \geq 4$  plants, different letters represent significant differences, one-way ANOVA with student's t-test ( $P < 0.05$ )

| MS            | I        | II      | III      | IV       | V        | VI          | VII         |
|---------------|----------|---------|----------|----------|----------|-------------|-------------|
| WT            | 0.4±0.55 | 1.2±1.1 | 0.4±0.55 | 0.8±0.84 | 0.8±0.45 | 1±0.71 a    | 0.6±0.55 a  |
| <i>18OE-1</i> | 0±0      | 0.5±1   | 0.25±0.5 | 0.5±0.58 | 1±1.4    | 2.25±0.5 b  | 1.5±0.78 b  |
| <i>18OE-2</i> | 0±0      | 0±0     | 0.75±0.5 | 0.5±0.58 | 1±0.82   | 0.75±0.96 a | 1.25±0.5 ab |

**Table 8. Lateral root primordia number at different developmental stages of *ABCG18* overexpression lines with 100 mM NaCl treatment.**  $n \geq 4$  plants, different letters represent significant differences, one-way ANOVA with student's t-test ( $P < 0.05$ )

| NaCl          | I        | II       | III         | IV       | V        | VI       | VII       |
|---------------|----------|----------|-------------|----------|----------|----------|-----------|
| WT            | 0.2±0.45 | 0±0      | 0.2±0.45 a  | 1.2±0.84 | 0.4±0.55 | 0.4±0.55 | 0.6±0.55  |
| <i>18OE-1</i> | 0±0      | 0.75±1.5 | 0.5±0.58 ab | 0.25±0.5 | 0.75±0.5 | 0.5±1    | 0.5±0.58  |
| <i>18OE-2</i> | 0±0      | 1±1.15   | 1.25±0.5 b  | 1±0.82   | 0.25±0.5 | 1±0.82   | 0.75±0.96 |

**Table 9. Lateral root primordia number at different developmental stages of *pSUC2:XVE:ABCG17* overexpression lines under normal condition.**  $n \geq 4$  plants, different letters represent significant differences, one-way ANOVA with student's t-test ( $P < 0.05$ )

| MS                 | I           | II        | III       | IV      | V        | VI        | VII       |
|--------------------|-------------|-----------|-----------|---------|----------|-----------|-----------|
| Control            | 1.2±1.64 ab | 1±1       | 1.2±1.1   | 1.2±1.1 | 1.2±1.1  | 1.6±0.89  | 0.4±0.55  |
| <i>pSUC2:G17-1</i> | 0.75±0.5 a  | 1.75±0.5  | 1.25±1.26 | 1±1.2   | 1.25±0.5 | 1.25±1.26 | 1.25±1.26 |
| <i>pSUC2:G17-2</i> | 0±0 b       | 1.75±0.96 | 2±1.4     | 2±0.82  | 0.5±1    | 1.25±0.96 | 0.5±0.58  |

**Table 10. Lateral root primordia number at different developmental stages of *pSUC2:XVE:ABCG17* overexpression lines with 5 µM estradiol treatment.**  $n \geq 4$  plants.

| Estradiol          | I         | II       | III       | IV        | V        | VI        | VII      |
|--------------------|-----------|----------|-----------|-----------|----------|-----------|----------|
| Control            | 1±0.82    | 0.75±0.5 | 1.25±0.5  | 1.75±0.5  | 0.25±0.5 | 0.25±0.5  | 0.5±0.58 |
| <i>pSUC2:G17-1</i> | 0.33±0.58 | 1±1      | 0.67±0.58 | 0.67±0.58 | 0.67±1.2 | 0.67±0.58 | 0±0      |
| <i>pSUC2:G17-2</i> | 0.75±0.5  | 1±1.4    | 0.75±0.96 | 0.75±0.96 | 0.25±0.5 | 1±0.82    | 1.25±1.5 |

**Table 11. Lateral root primordia number at different developmental stages of *pSUC2:XVE:ABCG17* overexpression lines with 5 µM estradiol and 100 mM NaCl treatment.**  $n \geq 4$  plants.

| Estradiol +NaCl    | I        | II       | III       | IV       | V         | VI       | VII      |
|--------------------|----------|----------|-----------|----------|-----------|----------|----------|
| Control            | 0.75±0.5 | 1.5±0.58 | 0.25±0.5  | 0.25±0.5 | 0.25±0.5  | 0±0      | 0.25±0.5 |
| <i>pSUC2:G17-1</i> | 1.25±0.5 | 0.25±0.5 | 0.25±0.5  | 1.25±1.5 | 0.75±0.96 | 0.5±0.58 | 0.5±0.58 |
| <i>pSUC2:G17-2</i> | 0.5±0.58 | 1.25±1.3 | 0.75±0.96 | 0.5±1    | 0±0       | 0.25±0.5 | 1.25±1.5 |

**Table 12. Lateral root primordia number at different developmental stages of *pSUC2*: *XVE: ABCG18* overexpression lines under normal condition.** n ≥ 4 plants, different letters represent significant differences, one-way ANOVA with student's t-test (P < 0.05)

| MS                             | I        | II       | III       | IV       | V        | VI          | VII       |
|--------------------------------|----------|----------|-----------|----------|----------|-------------|-----------|
| Control                        | 1.2±1.64 | 1±1      | 1.2±1.1   | 1.2±1.1  | 1.2±1.1  | 1.6±0.9 a   | 0.4±0.55  |
| <i>pSUC2</i> :<br><i>G18-1</i> | 1.5±1.1  | 1.5±1.4  | 0.83±0.75 | 1.2±1.2  | 0.5±0.84 | 0.5±0.55 b  | 0.67±0.52 |
| <i>pSUC2</i> :<br><i>G18-2</i> | 1.8±1.1  | 0.2±0.45 | 0.6±0.55  | 1.2±0.84 | 1.2±0.84 | 0.8±0.45 ab | 0.4±0.55  |

**Table 13. Lateral root primordia number at different developmental stages of *pSUC2*: *XVE: ABCG18* overexpression lines with 5 µM estradiol treatment.** n ≥ 4 plants, different letters represent significant differences, one-way ANOVA with student's t-test (P < 0.05)

| Estradiol                      | I       | II       | III      | IV       | V           | VI       | VII      |
|--------------------------------|---------|----------|----------|----------|-------------|----------|----------|
| Control                        | 1±0.82  | 0.75±0.5 | 1.25±0.5 | 0.75±0.5 | 0.25±0.5 a  | 0.25±0.5 | 0.5±0.58 |
| <i>pSUC2</i> :<br><i>G18-1</i> | 1±0.82  | 0.75±0.5 | 0.5±.58  | 0.25±0.5 | 1±0 b       | 0.25±0.5 | 0±0      |
| <i>pSUC2</i> :<br><i>G18-2</i> | 1.2±1.1 | 1±0.71   | 0.6±0.55 | 0.8±0.84 | 0.8±0.45 ab | 0.6±0.55 | 0.6±0.55 |

**Table 14. Lateral root primordia number at different developmental stages of *pSUC2*: *XVE: ABCG18* overexpression lines with 5 µM estradiol and 100 mM NaCl treatment.** n ≥ 4 plants, different letters represent significant differences, one-way ANOVA with student's t-test (P < 0.05)

| Estradiol<br>+NaCl             | I         | II        | III        | IV        | V        | VI        | VII       |
|--------------------------------|-----------|-----------|------------|-----------|----------|-----------|-----------|
| Control                        | 0.75±0.5  | 1.5±0.58  | 0.25±0.5 a | 0.25±0.5  | 0.25±0.5 | 0±0       | 0.25±0.5  |
| <i>pSUC2</i> :<br><i>G18-1</i> | 0.75±0.96 | 0.75±0.5  | 0.25±0.5 a | 0.25±0.5  | 0.25±0.5 | 0.25±0.5  | 0±0       |
| <i>pSUC2</i> :<br><i>G18-2</i> | 0.75±0.96 | 1.25±0.96 | 1±0 b      | 0.75±0.96 | 0.25±0.5 | 0.75±0.96 | 0.75±0.96 |

**Table 15. T-DNA insertions.**

| Gene          | Gene accession   | T-DNA line  | Insertion     |
|---------------|------------------|-------------|---------------|
| <i>ABCG17</i> | <i>AT3G55100</i> | CS332619    | Chr3 20421138 |
| <i>ABCG18</i> | <i>AT3G55110</i> | SALK_100187 | Chr3 20425486 |
| <i>ABCG18</i> | <i>AT3G55110</i> | GK-544E01   | Chr3 20424746 |

**Table 16. Primers used for genotyping T-DNA lines.**

| Gene                           | Primer name        | Primer sequence (5'-3')      |
|--------------------------------|--------------------|------------------------------|
| <i>abcg17</i>                  | <i>abcg17-LP</i>   | GCAGAACAGCTTCGTAGGGATACT     |
|                                | <i>abcg17-RP</i>   | TGATGCATTAGCAGGACA           |
|                                | BP                 | ATTTTGCCGATTTTCGGAAC         |
| <i>abcg18-1</i><br>SALK_100187 | <i>abcg18-1-LP</i> | AGAAGAGACCCCAAGCTAACG        |
|                                | <i>abcg18-1-RP</i> | TCACAGAGTTCGCACTTGATG        |
|                                | BP                 | ATTTTGCCGATTTTCGGAAC         |
| <i>abcg18-2</i><br>GK-544E01   | <i>abcg18-2-LP</i> | CAGCTGATTCATGGCTCCTAG        |
|                                | <i>abcg18-2-RP</i> | CAACACACTTGCATGGTTACG        |
|                                | BP                 | ATAATAACGCTGCGGACATCTACATTTT |



**Table 17. Cloning primers.**

| Promoter/gene                    | Forward primer (5'-3')             | Reverse primer (5'-3')           |
|----------------------------------|------------------------------------|----------------------------------|
| <i>pABCG17</i>                   | CACCTCACGCCCTCTTATTCTT<br>GCTTCC   | TCACGCCCTCTTATTCTTGC<br>TTCC     |
| <i>pABCG18</i>                   | CACCTCACGCCCTCTTATTCTT<br>GCTTCC   | TCACGCCCTCTTATTCTTGC<br>TTCC     |
| <i>ABCG17 CDS</i>                | CACCATGCTGCAAAGAGACGC<br>CGT GATC  | TCACGCCCTCTTATTCTTGC<br>TTCC     |
| <i>ABCG18 CDS</i>                | CACCATGCCACGTGTTTCGGC<br>GGAAATT   | TCACGTCCTCTTATTCTTAC<br>TCCC     |
| <i>ABCG19 CDS</i>                | CACCATGAATCTATCACTCAGC<br>GGTAGA   | TCACGTCCTCTTATTCTTGC<br>TCCC     |
| <i>pABCG17:</i><br><i>ABCG17</i> | AGGCGCGCCATGCTGCAAAGA<br>GACGCCGTG | TCACGCCCTCTTATTCTTGC<br>TTCCAAGC |
| <i>pABCG18:</i><br><i>ABCG18</i> | AGGCGCGCCATGCCACGTGTT<br>TCGGCGG   | CGGCGCGCCCACCCTTTCA              |

**Table 18. mir sequences.**

| Targeted gene    | mir sequences         |
|------------------|-----------------------|
| <i>ABCG17</i>    | TTATTTGTCCTGCTAACGCAT |
| <i>ABCG18</i>    | TAAGATAAACGTTTCCGGCAA |
| <i>ABCG17,18</i> | TGTTTAGAGTTACCGTGGCTT |

**Table 19. sgRNA for *ABCG17* and *ABCG18*.**

| <i>CRISPR17,18</i> | Primer sequences         |
|--------------------|--------------------------|
| Forward            | ATTGAAAGGCACGGTAACTCTAAA |
| Reverse            | AAACTTTAGAGTTACCGTGCCTTT |

**Table 20. Sequencing primers for *CRISPR17,18*.**

| Gene          | Forward primer (5'-3')   | Reverse primer (5'-3')   |
|---------------|--------------------------|--------------------------|
| <i>ABCG17</i> | ATGCTGCAAAGAGACGCCGTGATC | GCCTTCTTTCTCCCCCGGAGACAC |
| <i>ABCG18</i> | GCTCCGACTCAACACATATTGGAT | GTCGCTCTCCGCCAGATACTCCAC |

**Table 21. qRT-PCR primers.**

| Gene          | Forward primer (5'-3') | Reverse primer (5'-3')         |
|---------------|------------------------|--------------------------------|
| <i>ABCG1</i>  | GTGAAGTACCCGTATGAAGCG  | GTAGTTCCCCTAATGGCGTG           |
| <i>ABCG17</i> | CCCGAAGGAACAAGAGGTTT   | GTGAGGTTCTTGACTAACTCTTA<br>GCT |
| <i>ABCG18</i> | GTATCCGATCCCGGTTGAT    | AATTCCGAATGTCATGATGAGTTA       |
| <i>ABCG20</i> | AAGACAACCAGAGCTATTCGG  | AGCGTTCCTGTATACCTCTTGG         |

## Supplementary Dataset 1

### ABA homeostasis and long-distance translocation are regulated by redundant ABCG ABA importers

Zhang et al., 2021

#### Peak chromatograms for ABA and ABA related metabolites

ABA standard 2.5 µg/ml

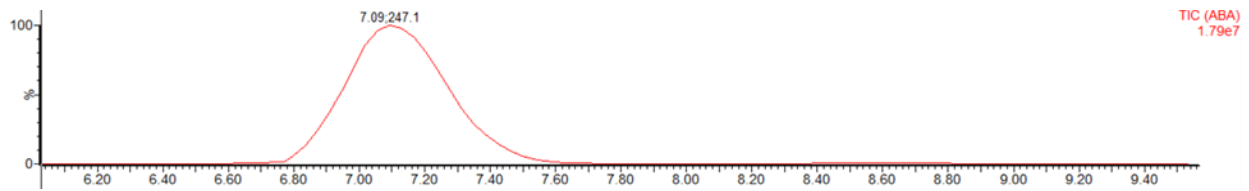

ABA standard MRM transition 1

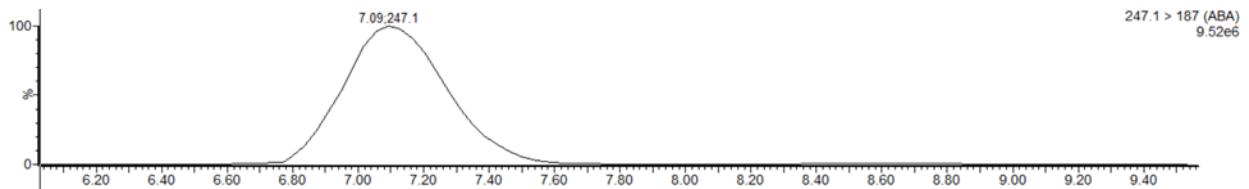

ABA standard MRM transition 2

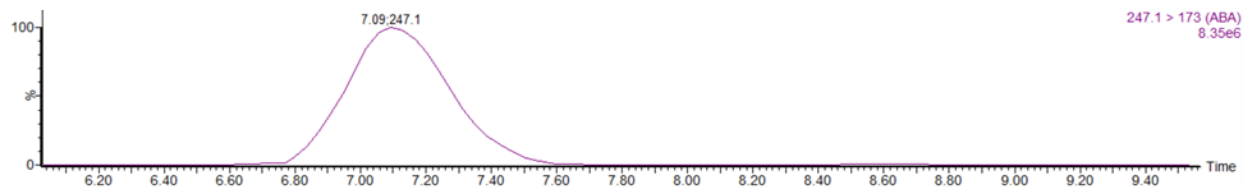

Sample-ABA

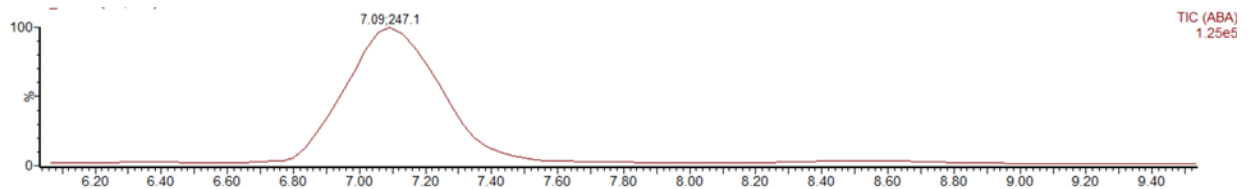

**Sample-ABA MRM transition 1**

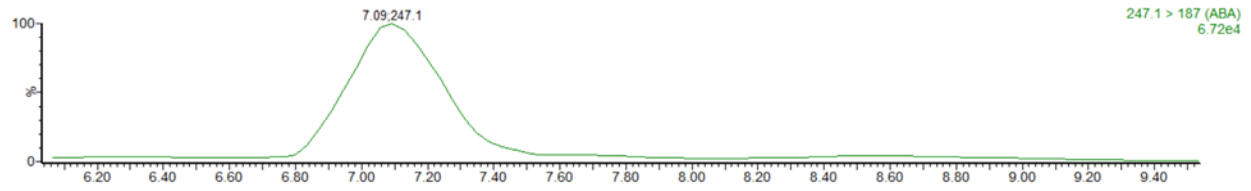

**Sample-ABA MRM transition 2**

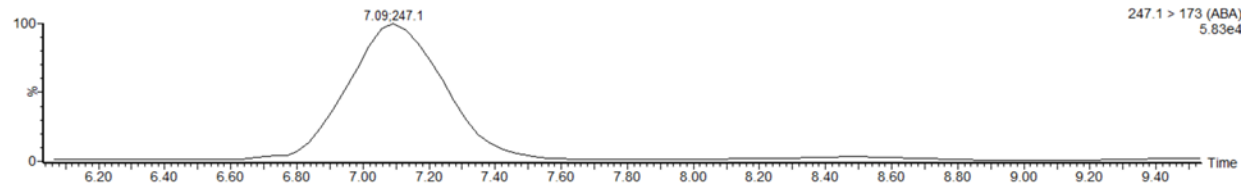

**D6-ABA standard**

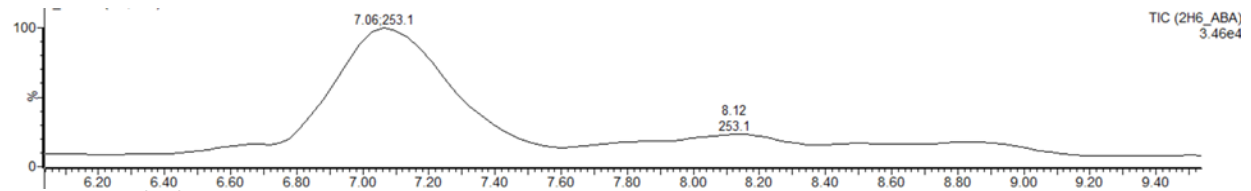

**D6-ABA standard MRM transition 1**

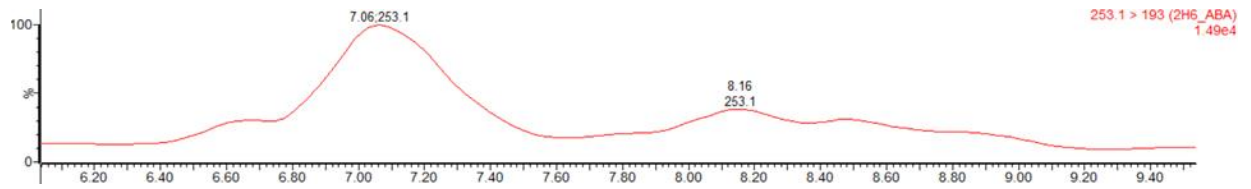

**D6-ABA standard MRM transition 2**

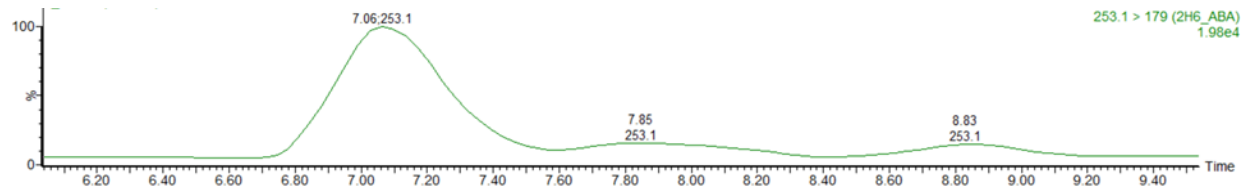

**D6-ABA-sample**

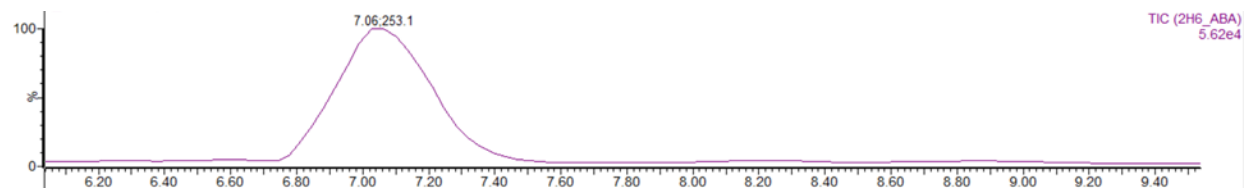

**D6-ABA-sample-MRM transition1**

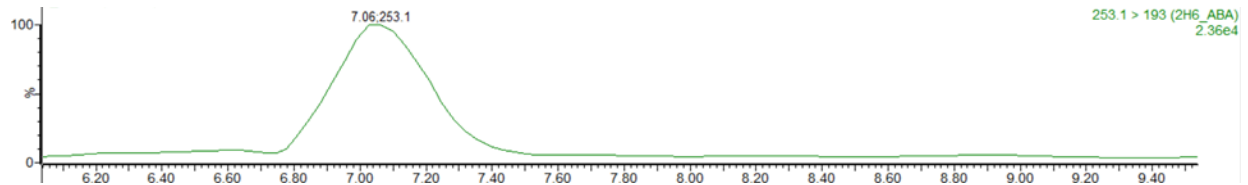

D6-ABA-sample-MRM transition2

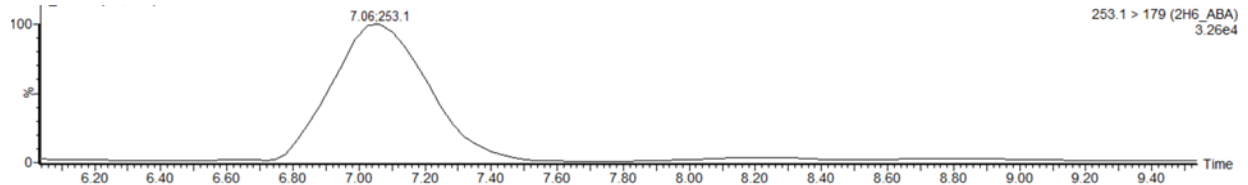

ABA-GE standard 2µg/ml

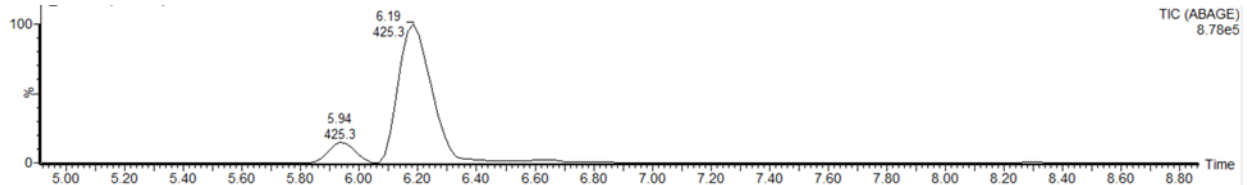

ABA-GE standard MRM transition1

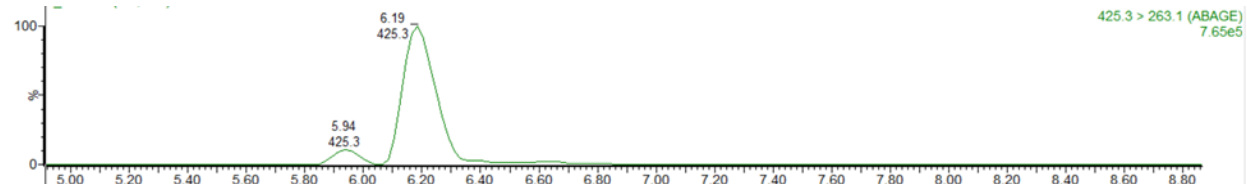

ABA-GE standard MRM transition2

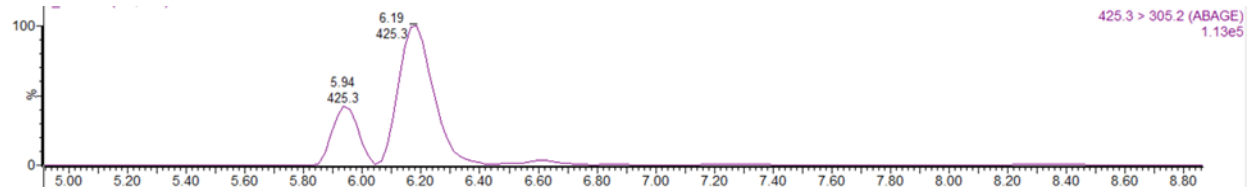

ABA-GE sample

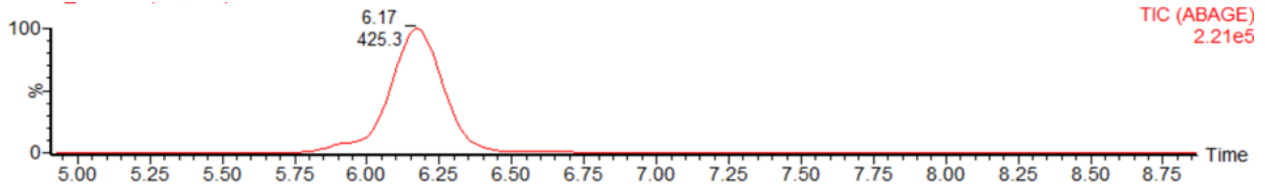

ABA-GE sample MRM transition1

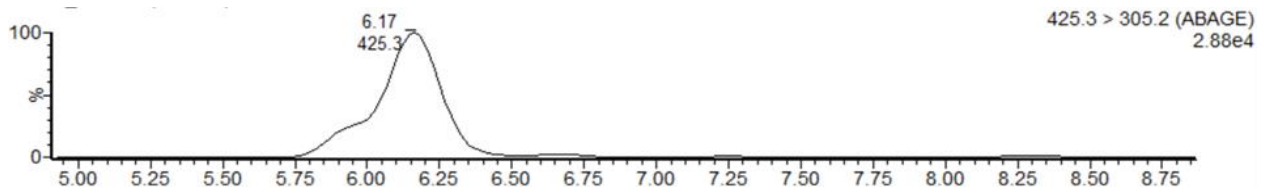

ABA-GE sample MRM transition2

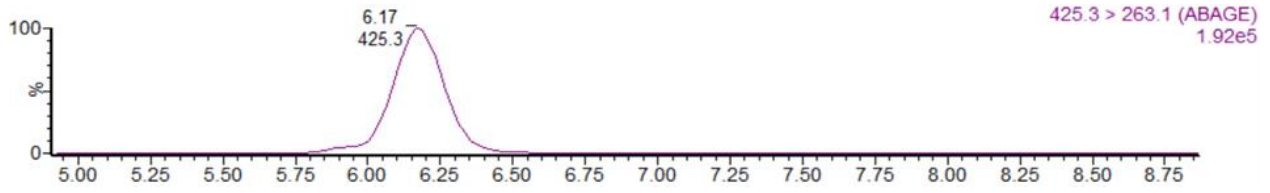

D5-ABA-GE Standard 52.5 ng/ml

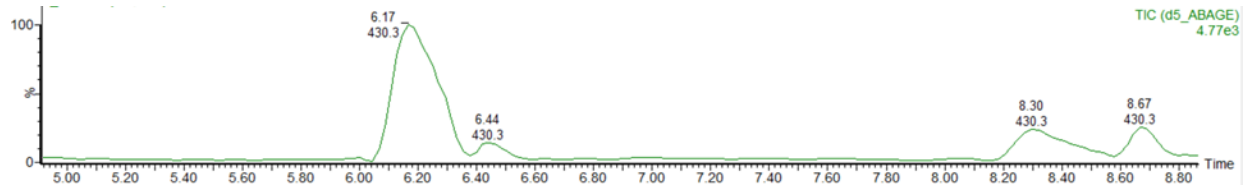

D5-ABA-GE MRM transition1

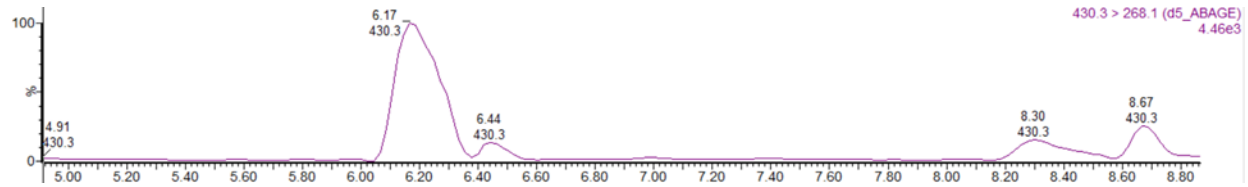

D5-ABA-GE MRM transition2

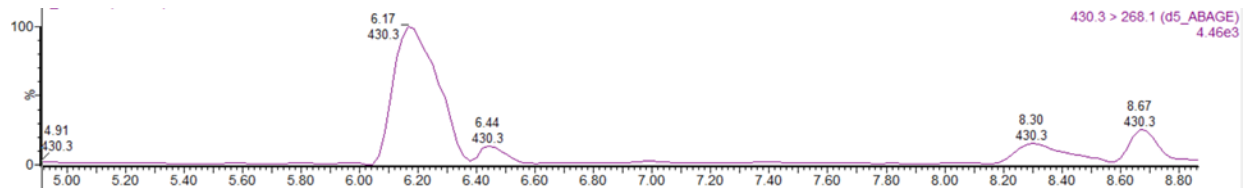

D5-ABA-GE Sample

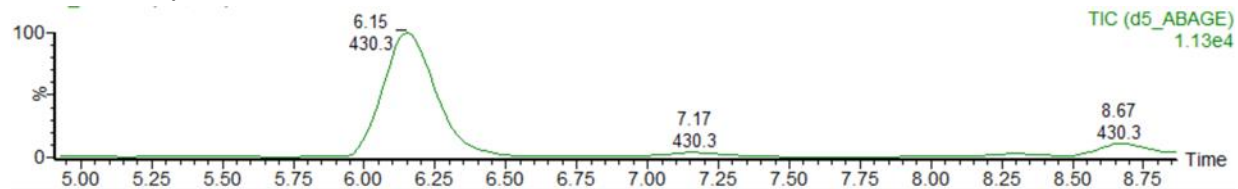



D5-ABA-GE Sample MRM transition1

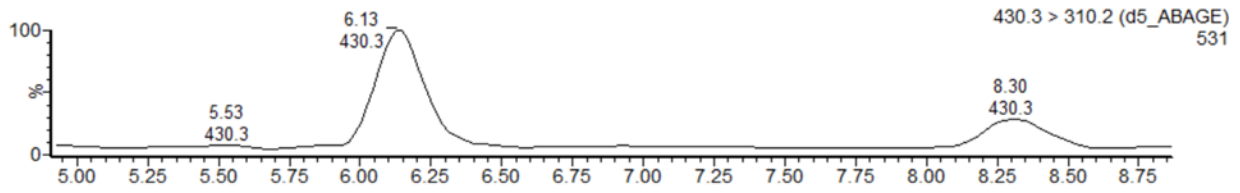

D5-ABA-GE Sample MRM transition2

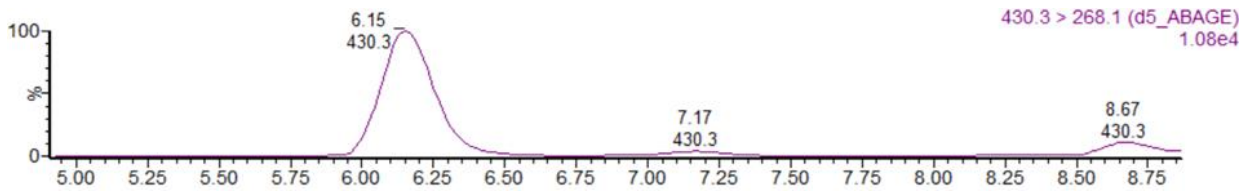

PA standard 15ng/ml

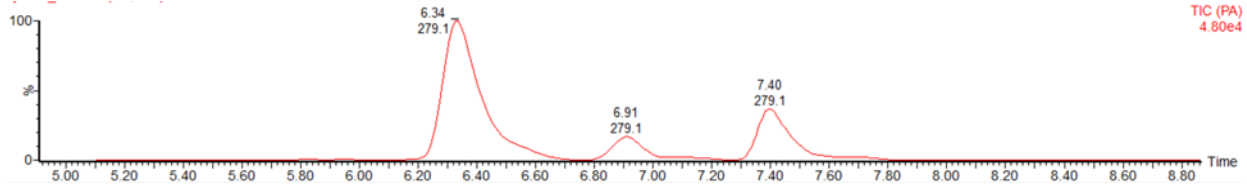

PA standard MRM transition1

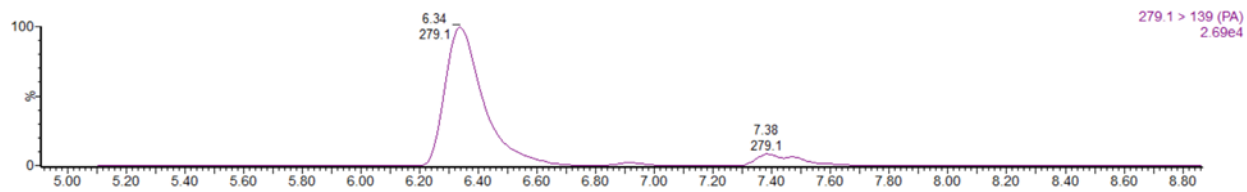

PA standard MRM transition2

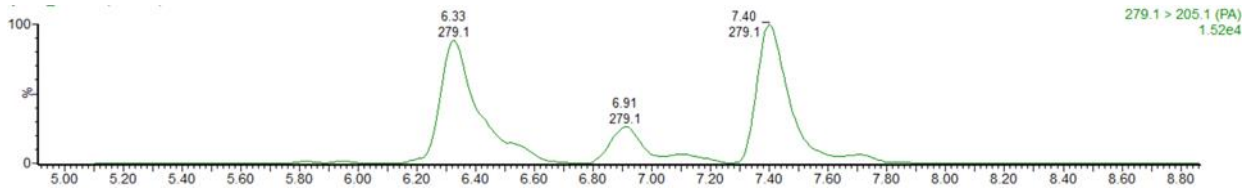

PA sample

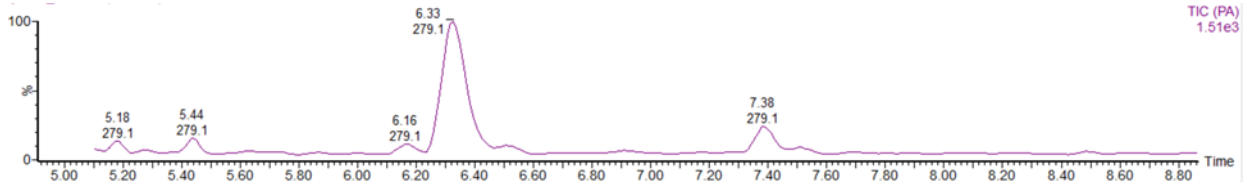

PA sample MRM transition1

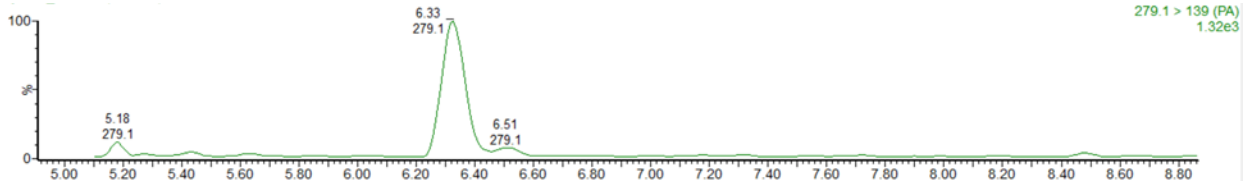

PA sample MRM transition2

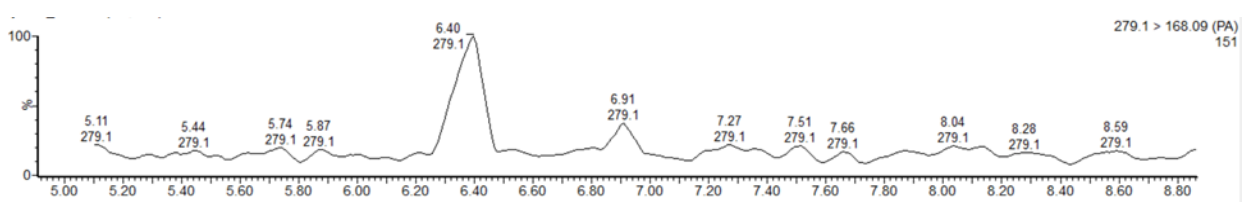

D3-PA standard 150 ng/ml

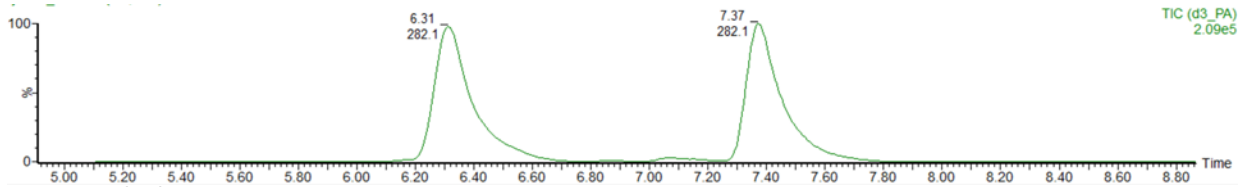

D3-PA standard MRM transition1

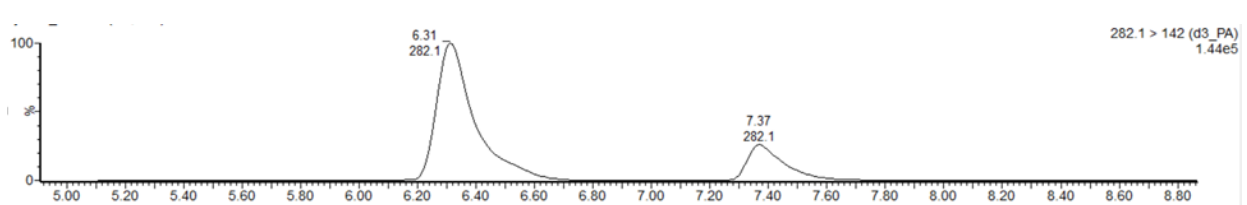

D3-PA standard MRM transition2

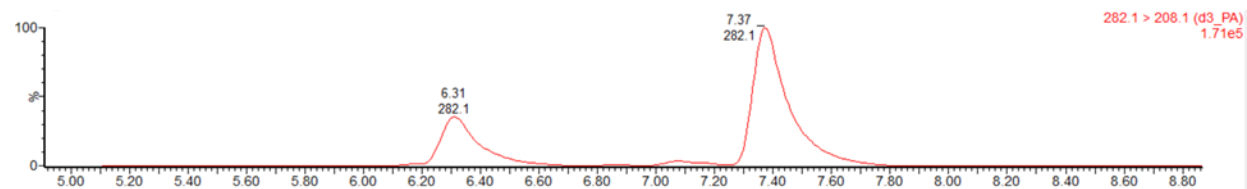

D3-PA sample

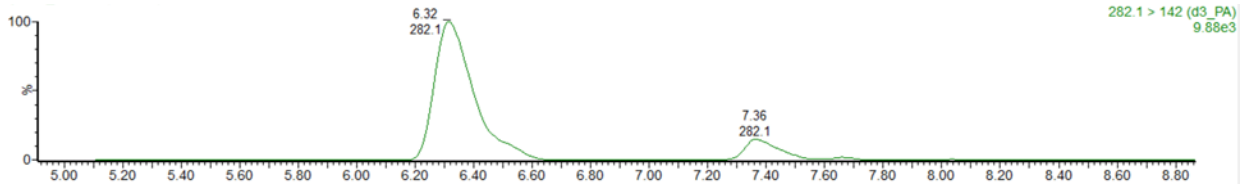

D3-PA sample MRM transition1

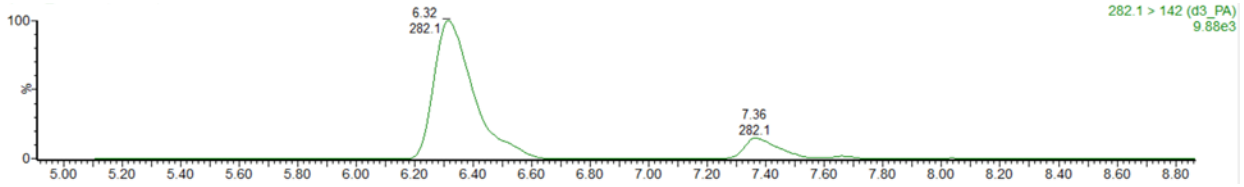

D3-PA sample MRM transition2

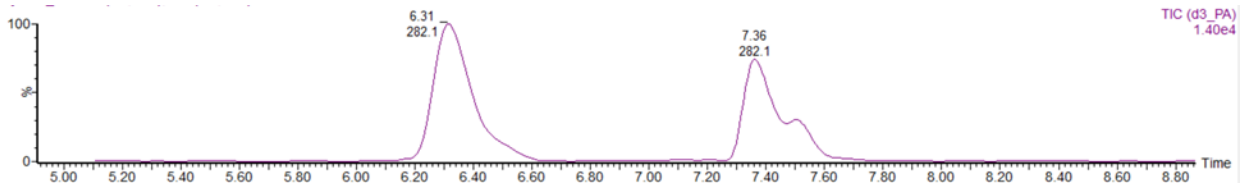

DPA standard 300 ng/ml

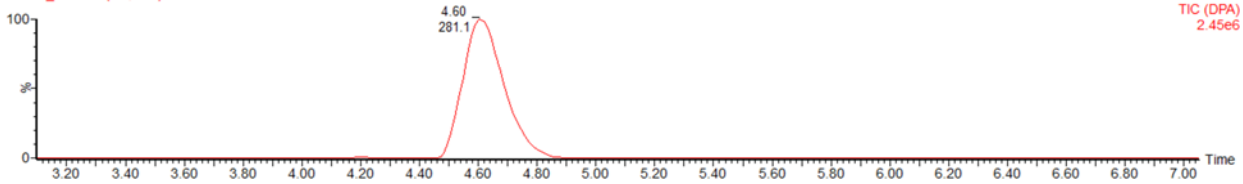

DPA standard MRM transition1

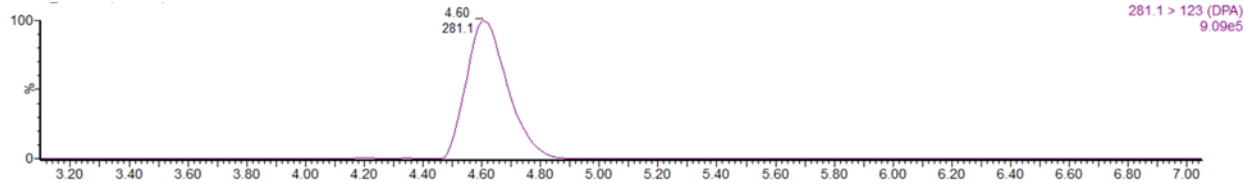

DPA standard MRM transition2

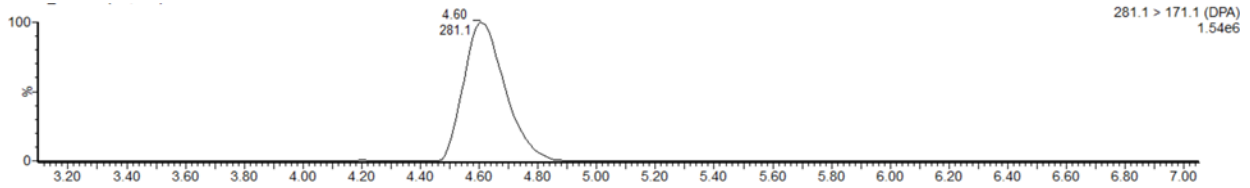

DPA sample

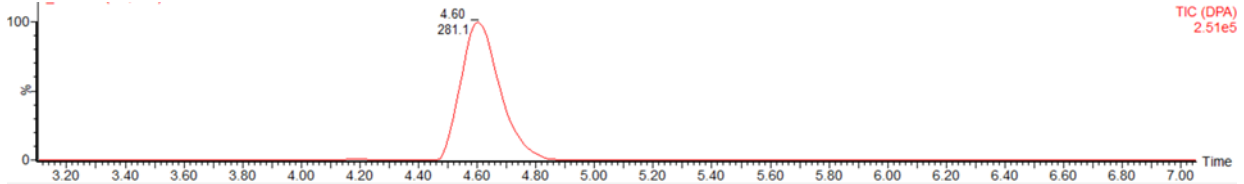

DPA sample MRM transition1

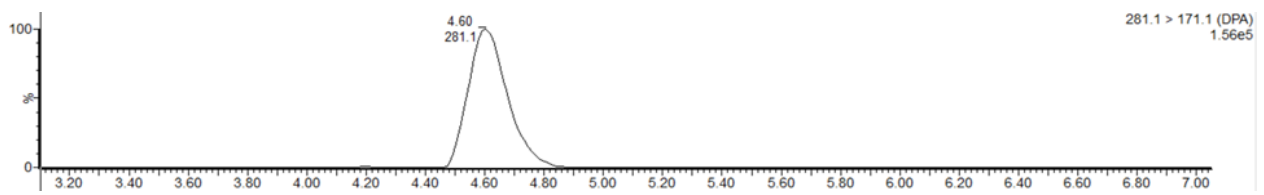

DPA sample MRM transition2

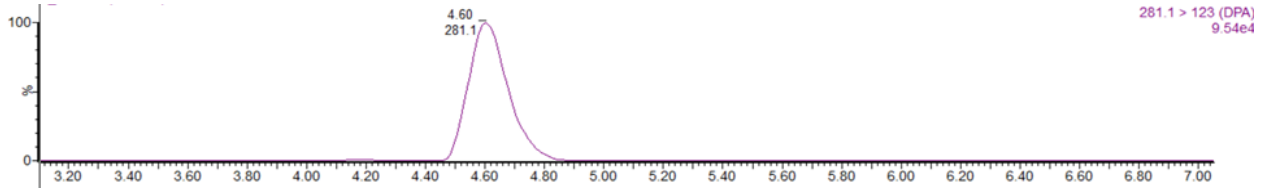

D3-DPA Standard 150 ng/ml

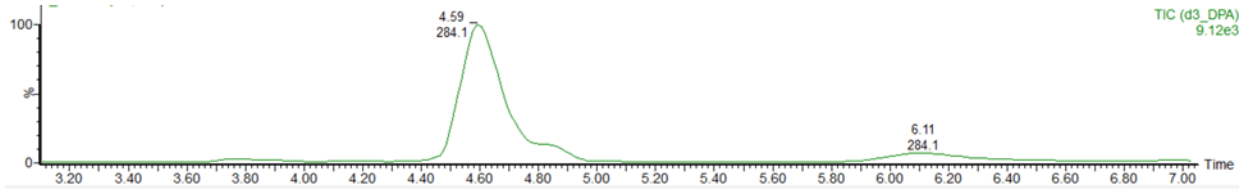

D3-DPA Standard MRM transition1

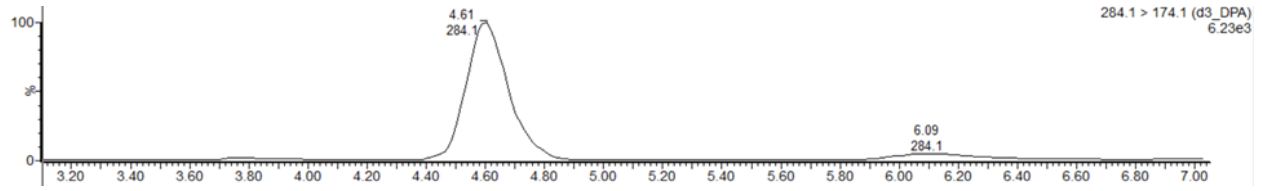

D3-DPA Standard MRM transition2

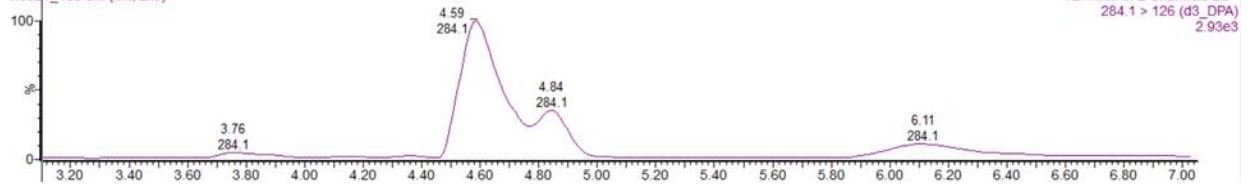

D3-DPA Sample

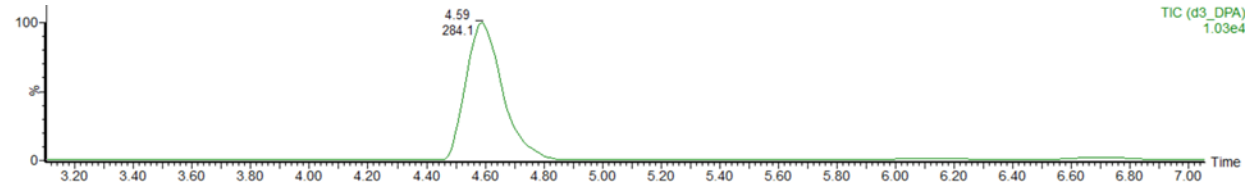

D3-DPA Sample MRM transition1

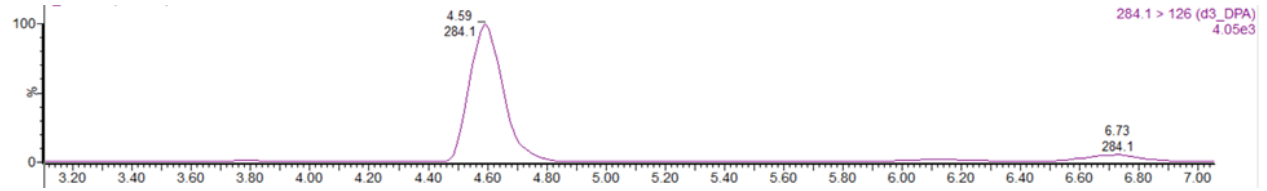

D3-DPA Sample MRM transition2

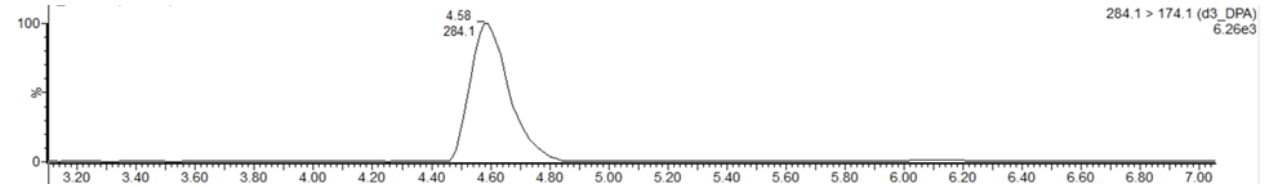

Neo PA standard 2.5 µg/ml

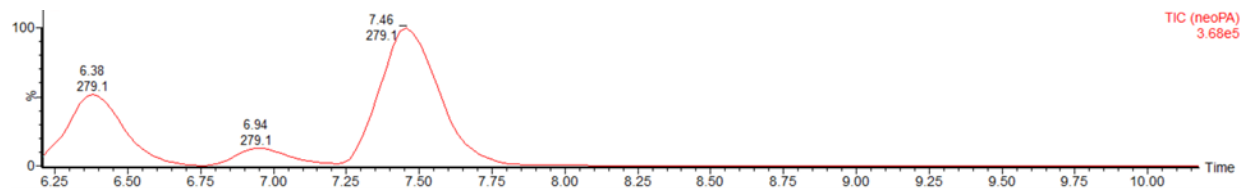

Neo PA standard MRM transition1

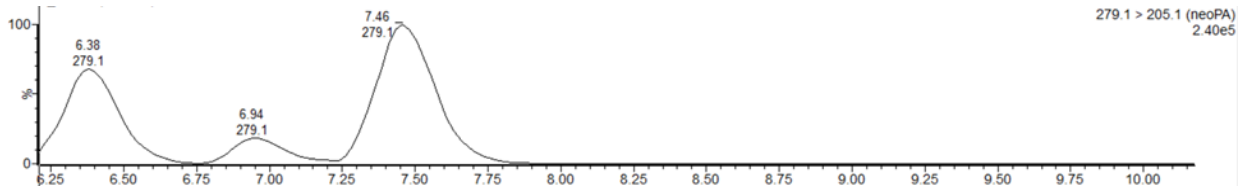

Neo PA standard MRM transition2

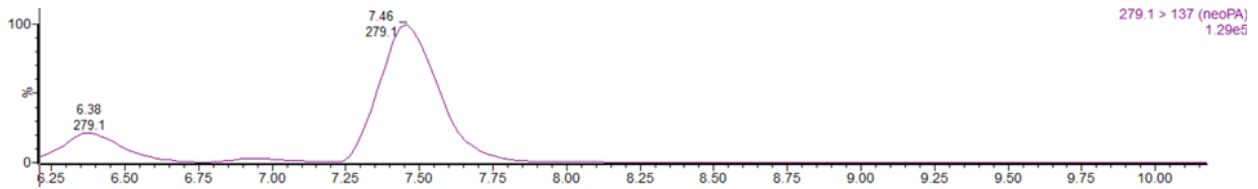

Neo PA sample

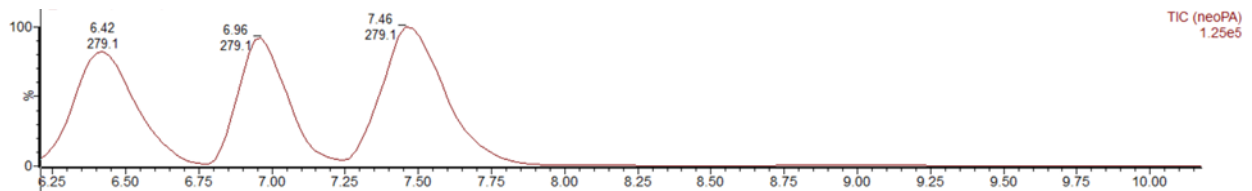

Neo PA sample MRM transition1

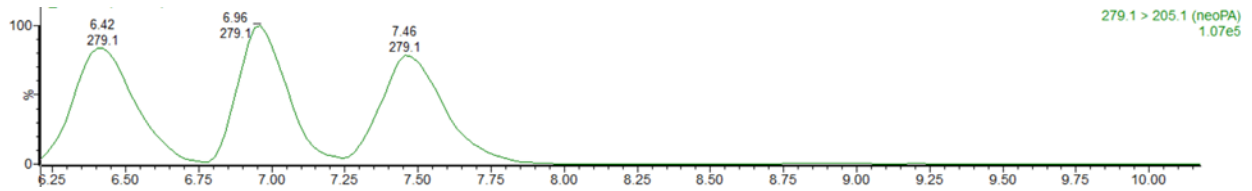

Neo PA sample MRM transition2

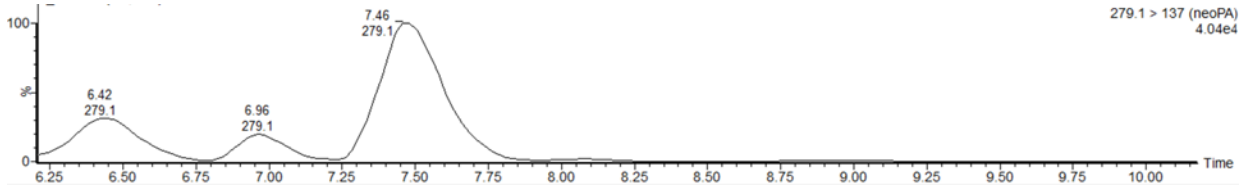

D3-neo PA Standard 150 ng/ml

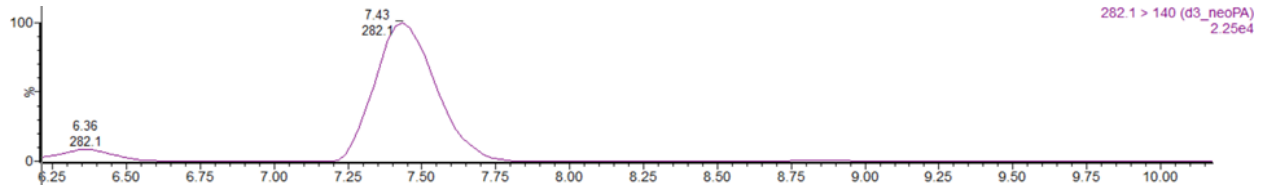

D3-neo PA Standard MRM transition1



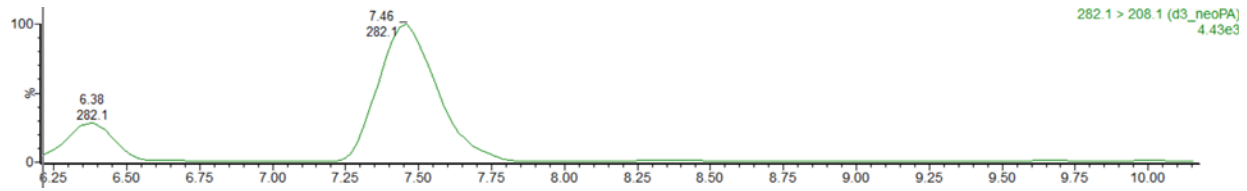

**D3-neo PA Standard MRM transition2**

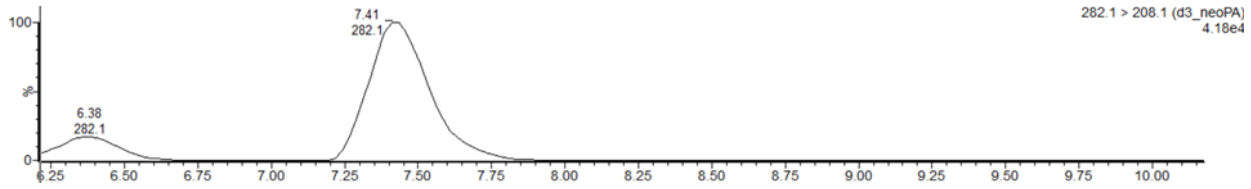

**D3-neo PA Sample**

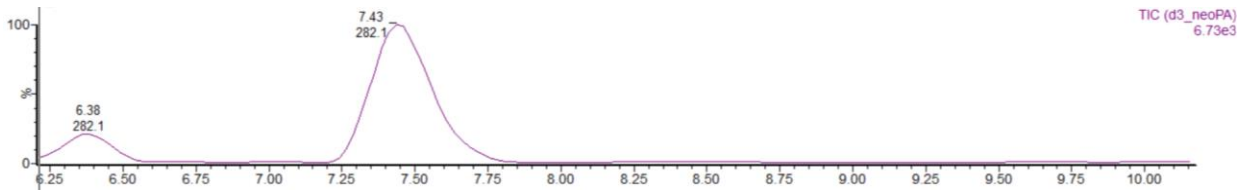

**D3-neo PA Sample MRM transition1**

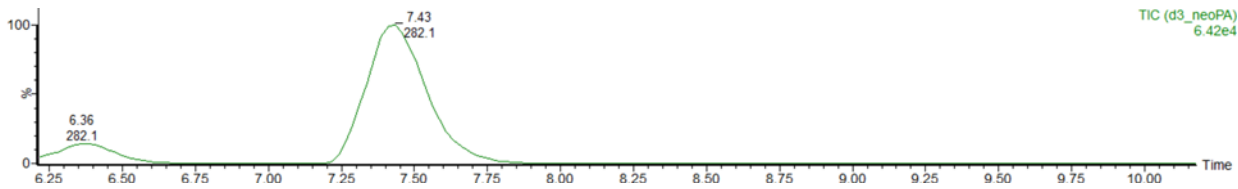

**D3-neo PA Sample MRM transition2**

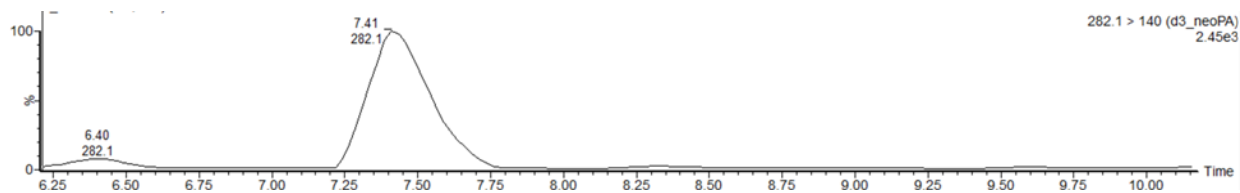

**7-hydroxy ABA standard 600 ng/ml**

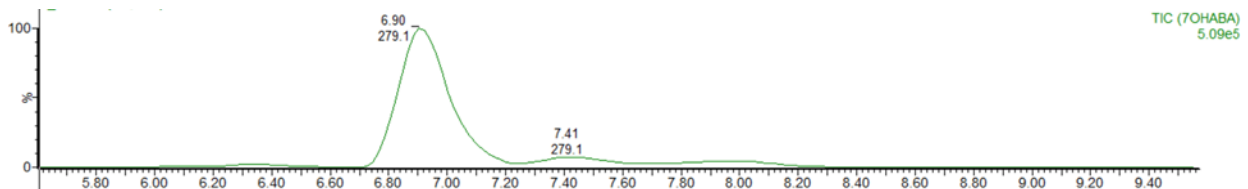

7-hydroxy ABA standard MRM transition1

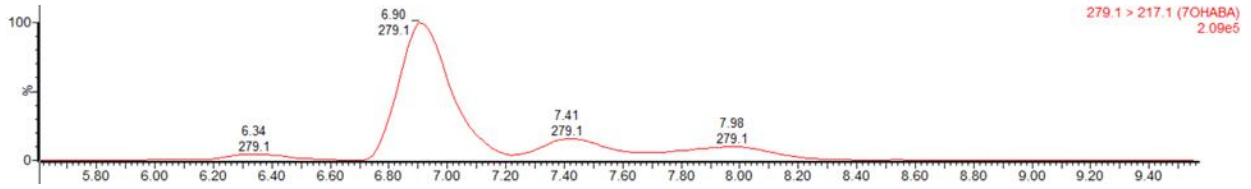

7-hydroxy ABA standard MRM transition2

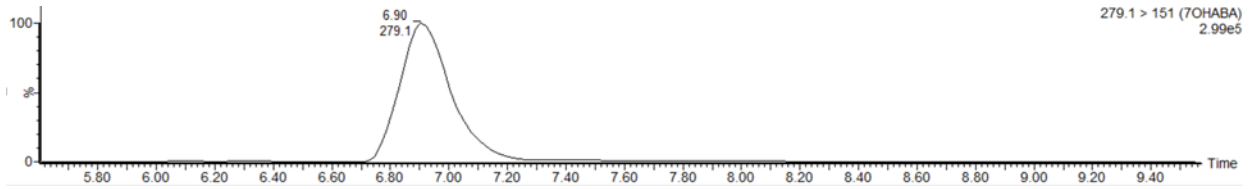

7-hydroxy ABA-sample

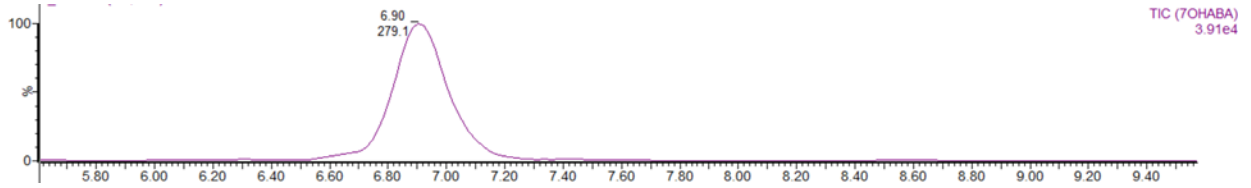

7-hydroxy ABA sample MRM transition1

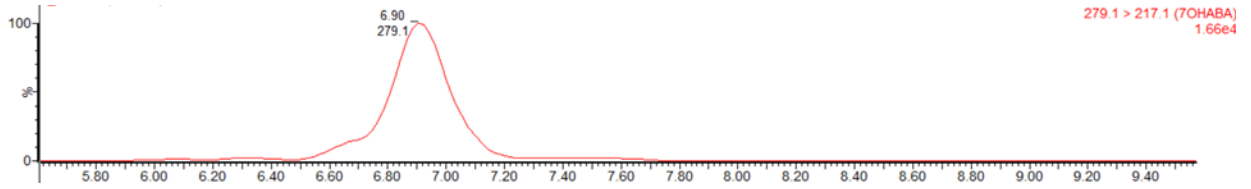

7-hydroxy ABA sample MRM transition2

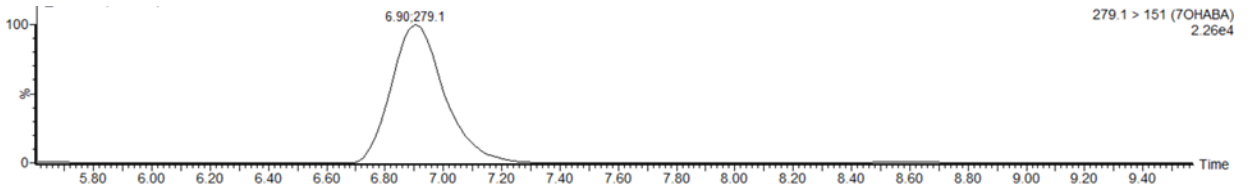

D4-7-hydroxy ABA standard 150 ng/ml

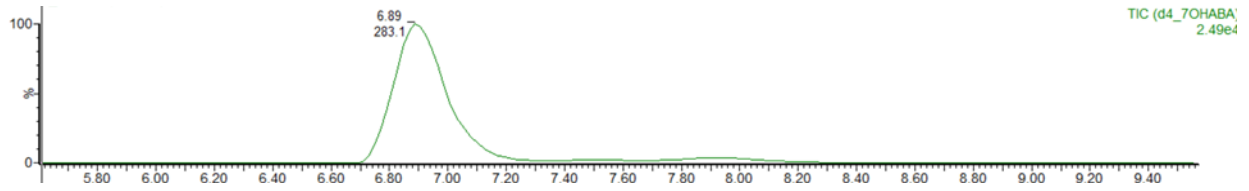

D4-7-hydroxy ABA standard MRM transition1

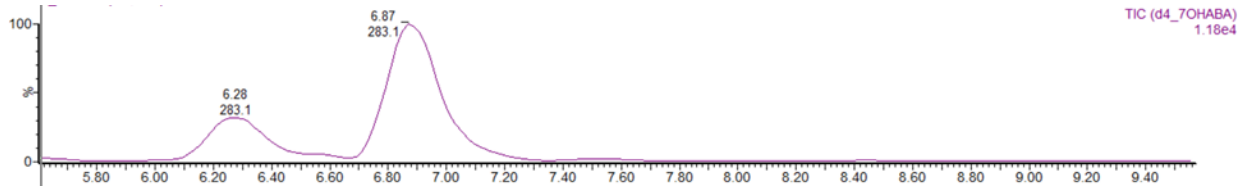

D4-7-hydroxy ABA standard MRM transition2

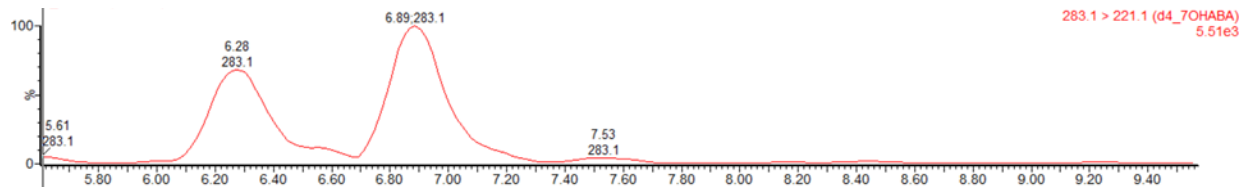

D4-7-hydroxy ABA sample

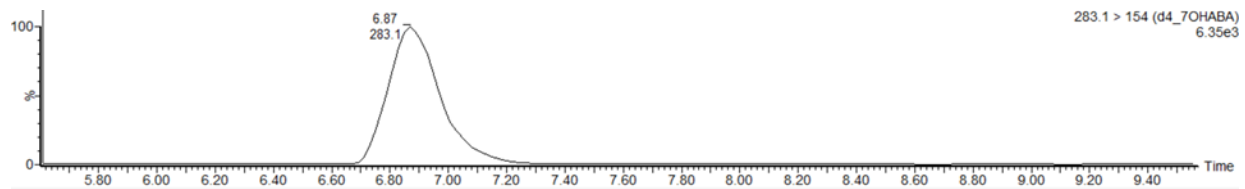

D4-7-hydroxy ABA sample MRM transition1

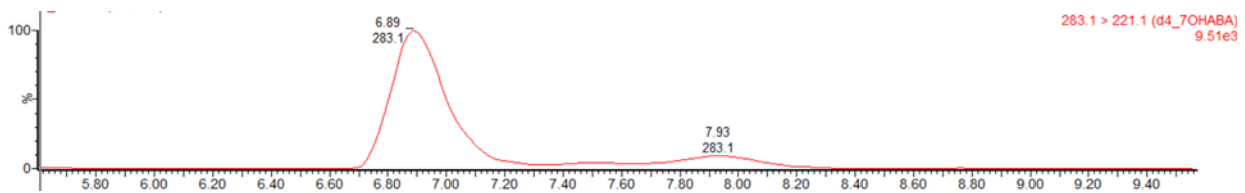

D4-7-hydroxy ABA sample MRM transition2

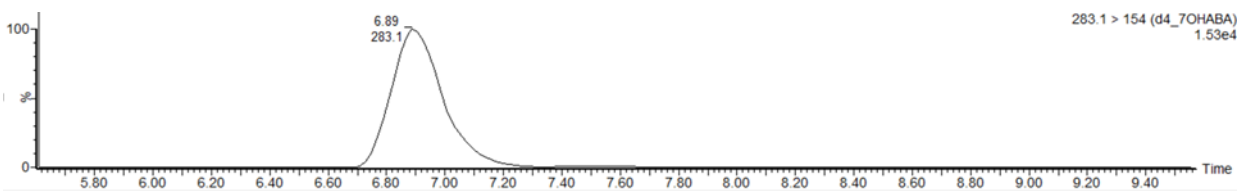

D- refers to the deuterated standard, i.e. deuterium labelled internal standard, D3- means three hydrogens are replaced by three deuterium atoms, similarly for 4, 5 and 6.
